# 1 **Expansion of cortical layers 2 and 3 in human left temporal cortex associates with verbal** 2 **intelligence**

3 Heyer DB<sup>1#</sup>, Wilbers R<sup>1#</sup>, Galakhova AA<sup>1</sup>, Hartsema E<sup>1</sup>, Braak S<sup>1</sup>, Hunt S<sup>1</sup>, Verhoog MB<sup>1,5</sup>, Muijtjens ML<sup>1</sup>,  
4 Mertens EJ<sup>1</sup>, Idema S<sup>2</sup>, Baayen JC<sup>2</sup>, de Witt Hamer P<sup>2</sup>, Klein M<sup>3</sup>, McGraw M<sup>4</sup>, Lein ES<sup>4</sup>, de Kock CPJ<sup>1</sup>,  
5 Mansvelder HD<sup>1\*</sup>, Goriounova NA<sup>1\*</sup>

6  
7 <sup>1</sup>Department of Integrative Neurophysiology, Amsterdam Neuroscience, Center for Neurogenomics and  
8 Cognitive Research (CNCR), Vrije Universiteit Amsterdam, De Boelelaan 1085, Amsterdam 1081 HV, the  
9 Netherlands.

10 <sup>2</sup>Department of Neurosurgery, Amsterdam UMC, De Boelelaan 1117, 1081HV Amsterdam, the  
11 Netherlands.

12 <sup>3</sup>Department of Medical Psychology, Amsterdam UMC, De Boelelaan 1118, Amsterdam 1081 HZ, the  
13 Netherlands.

14 <sup>4</sup>Allen Institute for Brain Science, 615 Westlake Ave N, Seattle, WA 98109, USA.

15 <sup>5</sup>Department of Human Biology, Neuroscience Institute, University of Cape Town, Anzio road,  
16 Observatory 7925, Cape Town, South Africa

17

18

19 # equal contribution

20 \* senior authors

21

22 Correspondence to: [n.a.goriounova@vu.nl](mailto:n.a.goriounova@vu.nl) or [h.d.mansvelder@vu.nl](mailto:h.d.mansvelder@vu.nl)

23

## 24 **Abstract**

25 The expansion of supragranular cortical layers is thought to have enabled evolutionary  
26 development of human cognition and language. However, whether increased volume of supragranular  
27 cortical layers can actually support greater cognitive and language abilities in humans has not been  
28 demonstrated. Here, we find that subjects with higher general and verbal intelligence test (VIQ) scores  
29 have selectively expanded layers 2 and 3 only in the left temporal cortex, an area associated with  
30 language and IQ-test performance. This expansion is accompanied by lower neuron densities and larger  
31 cell-body size. Furthermore, individuals with higher VIQ scores had neurons with larger dendritic trees  
32 in left temporal cortex, potentially impacting their function. Indeed, neurons of subjects with higher VIQ  
33 scores had faster action potential upstroke kinetics, which improves information processing. These data  
34 show that expansion of supragranular layer volume, cortical and cellular micro-architecture and function  
35 are associated with improved verbal mental ability in human subjects.

36

## 37 **Introduction**

38 Higher-order functions of the human brain, such as reasoning and language, rely on the neocortex.  
39 Cortical expansion and increased neuronal complexity are regarded as the substrates for the  
40 evolutionary development of higher cognitive functions that distinguish humans from other species <sup>1,2</sup>.  
41 In particular, supragranular cortical layers 2 and 3 (L2/L3) in humans have a disproportionately high  
42 volume compared to primates <sup>3</sup>, and hold principal neurons with extensive dendritic trees and rare  
43 functional properties optimized for information processing <sup>4-8</sup>. Far from passively integrating the  
44 incoming inputs, the different branches of the dendritic tree act as separate computational elements, so

45 that a single neuron is equivalent in computational power to a multi-layer neural network made up of  
46 several nodes<sup>9-11</sup>. Indeed, human neurons in supragranular cortical layers have 3-fold larger and more  
47 complex dendritic trees than other species<sup>5</sup> and human dendrites were recently shown to perform  
48 combinations of logical operations similar to a multi-layered network<sup>12</sup>. Larger human neurons also have  
49 improved input-output performance, transferring synaptic input to action potential (AP) output with  
50 higher bandwidth<sup>4</sup>, as APs in neurons with larger dendrites have faster upstrokes<sup>7,8</sup>. Whether such  
51 neuronal properties can support verbal cognitive ability in humans has not been tested.

52 In healthy subjects, total cortical thickness associates with full-scale IQ test scores<sup>13-15</sup>. However,  
53 whether this is explained by selective expansion of supragranular layers 2 and 3 is not known due to  
54 insufficient resolution of brain-imaging. Furthermore, to understand the impact of increased cortical  
55 layer volume and cell size for cognitive brain function, a direct comparison to other primate species is  
56 inherently problematic due to profound differences in cognitive behaviour and learning<sup>16</sup>. This is even  
57 more so the case in regards to the cornerstone of human cognition: the ability to use language<sup>17</sup>. In the  
58 human brain, neural substrates of the language system are distributed over cortical areas in temporal,  
59 frontal and parietal lobes and are lateralized to the left hemisphere in 96% of the population<sup>18</sup>. This left  
60 lateralisation offers an opportunity to investigate the association between verbal intelligence and  
61 cortical architecture and cellular parameters, since these associations must be limited to the left  
62 hemisphere.

63 Here we tested whether verbal cognitive abilities associate with cortical microstructure by  
64 collecting temporal cortical tissue from 59 subjects undergoing neurosurgical treatment of  
65 predominantly epilepsy or tumors (Supplementary Table 1). The tissue originated exclusively from  
66 middle temporal gyrus (MTG, Brodmann area 21) from the left or right hemisphere. Although the  
67 resected MTG cortex is not essential for speech (is not part of classical Broca and Wernicke areas),  
68 several lines of evidence point to this region as an important site in verbal cognition. Analysis of localized  
69 lesions, functional imaging and positron emission tomography in large cohorts of subjects identified this  
70 region as a part of the semantic system serving concept and word retrieval and categorization<sup>19, 20</sup>.  
71 Furthermore, multiple studies of patients with lesions in MTG show that this area is strongly associated  
72 with language comprehension and specific semantic deficits<sup>21-24</sup>. In addition, recordings of single neuron  
73 activity in awake neurosurgery patients performing verbal tasks show that MTG is the area of temporal  
74 cortex where neurons selectively respond to language and verbal memory tasks<sup>25,26</sup>. Because of this role  
75 of the left MTG as an integral part of the semantic processing network that underlies verbal cognition,  
76 we collected Verbal IQ scores (VIQ) as well as Full Scale (FSIQ) and Performance IQ scores (PIQ) from  
77 Wechsler Adult Intelligence Scale (WAIS IV) tests that subjects underwent shortly before surgery.

78 Here we show that individual differences in verbal intelligence in human subjects can be explained  
79 by differences in cortical and cellular architecture and function. Our findings provide evidence  
80 supporting the notion that biological factors of evolutionary brain development can be driving factors  
81 for emerging human mental abilities.

82

## 83 **Results**

84

### 85 **Subjects with higher general and verbal IQ scores have thicker cortical thickness in the left MTG due** 86 **to the selective expansion of L2/L3**

87 Verbal intelligence has been shown to have strong structural correlates in the brain, including a  
88 prominent increase in cortical thickness exclusively in the left temporal lobe of subjects with higher VIQ

89 scores<sup>14</sup>. However, it is not known whether this expansion is due to the upscaling of all or only specific  
90 cortical layers. To investigate this we collected neurosurgically resected left or right MTG from 59  
91 subjects treated for epilepsy or tumor (Supplementary table 1). We first asked whether dimensions of  
92 specific cortical layers in left or right MTG associate with IQ scores. To visualize cortical layer boundaries,  
93 we DAPI stained cortical sections and quantified the thickness of the cortical layers at 4 to 5 locations  
94 from multiple (range = 1-9, median = 2) slices per subject (Fig 1a, b). To minimize biological variation, we  
95 quantified layer thickness only at the crown of the gyrus (Fig 1b). We calculated average layer thickness  
96 per subject and compared 2 groups of subjects with low and high verbal IQ (VIQ) scores. Only in the left  
97 and not right MTG, we found that subjects with high VIQ scores (VIQ>90) have selectively expanded  
98 cortical L2/L3 compared to subjects with lower VIQ scores (VIQ<90), while other layers were similar  
99 across the VIQ groups (Fig. 1c). We also observed a strong positive correlation between individual VIQ  
100 scores of the subjects and total cortical thickness and L2/L3 thickness in the left MTG ( $R=0.8$ ,  $R^2 = 0.66$ ;  
101 Fig. 1d, Supplementary Fig 1, Fig. 1d). In contrast, VIQ scores did not correlate with the thickness of other  
102 cortical layers (Supplementary Fig. 1), suggesting that the expansion of L2/L3 in subjects with higher  
103 verbal intelligence underlies the increase in total cortical thickness of the left MTG.

104 On average, total cortical thickness, as well as L2/L3 thickness, was larger in the right MTG than  
105 left MTG. This observed asymmetry reflects a natural asymmetry in cortical thickness between left and  
106 right hemispheres, as evidenced by a recent large analysis of MRI scans of >17,000 healthy individuals  
107 from 99 datasets, where middle temporal area was shown to have higher thickness in the right  
108 hemisphere than in the left<sup>33</sup>.

109 Intellectual performance is generally measured by FSIQ scores that are derived from both verbal  
110 (VIQ) and non-verbal, performance IQ (PIQ) scores. We therefore performed additional analysis on the  
111 relationship between L2/L3 thickness separately for VIQ, PIQ and FSIQ in the left and right MTG. The  
112 summarized linear regression results for all layers in left and right MTG, and for verbal and performance  
113 IQ scores revealed that the correlations of FSIQ, VIQ and PIQ scores with total cortical thickness are  
114 attributable to the selective expansion of L2/L3 in the left MTG. Although FSIQ, VIQ and PIQ all  
115 significantly correlated with total and L2/L3 thickness in the left MTG, variance explained ( $R^2$ ) was higher  
116 when running linear regression on VIQ than PIQ (Supplementary Fig. 2). To exclude possible confounding  
117 effects of age and gender, we ran partial correlations for the relationship between VIQ and L2/L3  
118 thickness. We computed the zero-order and partial correlation coefficients ( $r$ ) while controlling for age  
119 and gender separately for FSIQ, VIQ and PIQ and L2/L3 thickness in the left MTG. We find that the  
120 correlations remained high and significant (Supplementary Fig. 3a). Furthermore, L2/L3 thickness did not  
121 correlate significantly with age of the subjects and did not show significant difference between males  
122 and females (Supplementary Fig. 3b-c).

123 As cortical thickness in human subjects is usually measured using structural MRI scans, we next  
124 asked whether cortical thickness quantified using histological methods is correlated with cortical  
125 thickness quantified from MRI. To this end, we quantified cortical thickness from T1-weighted pre-  
126 surgical MRI scans using voxel-based morphometry (Fig. 1f). We selected only MTG area in the  
127 hemisphere where the resected tissue originated and calculated average MTG cortical thickness for each  
128 subject. We tested whether MRI-derived cortical thickness correlated with the histological  
129 quantifications of cortical thickness. We find that MRI and histological quantifications positively  
130 correlate with each other. Moreover, cortical thickness measured from MRI also positively correlates  
131 with the L2/L3 thickness in the gyral crown, the metric that we find most strongly related to verbal  
132 intelligence (Fig. 1f). Thus, selective expansion of the L2/L3 thickness in the left MTG strongly associates  
133 with the gain in human cognitive function, including verbal cognitive function.

134

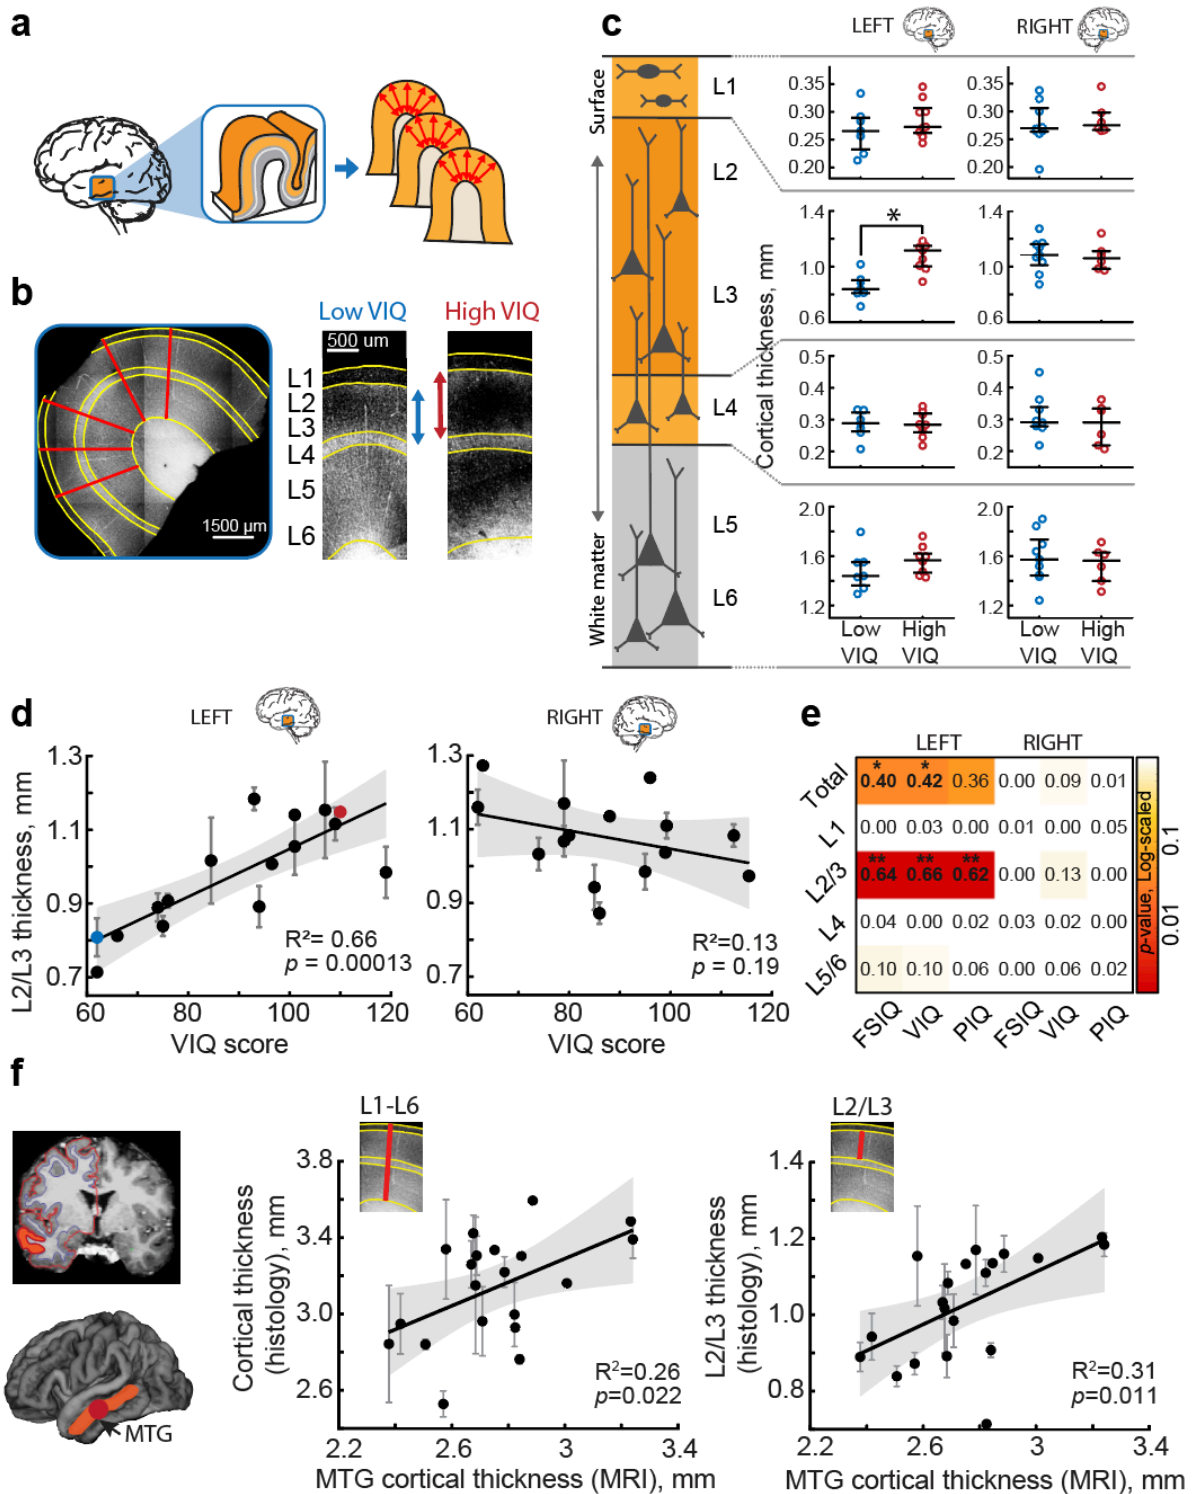

135

136

137

138 **Figure 1. The expansion of cortical L2/L3 in the left MTG is associated with higher VIQ scores.**

139 **a** Slices from temporal lobe tissue resected during neurosurgery were DAPI-stained and imaged to determine the

140 thickness of the cortical layers. **b** Example of cortical thickness measurements: the borders between the cortical

141 layers were drawn on the images (yellow lines). For each patient, the average thickness was calculated along 4-5

142 radial lines (red) from several slices of gyral crown. **c** subjects with higher VIQ scores have thicker L2/L3 in the left

143 MTG (Median(IQR) = 1.116(1.002-1.150) mm), than subjects with low VIQ (0.839(0.809-0.903) mm, Mann-Whitney  
144 U test,  $U = 32$ ,  $p = 0.0021$ ). Open circles represent the average thickness of the different cortical layers from each  
145 subject (from top to bottom: L1; L2/L3; L4; L5/L6), red for subjects with  $VIQ > 90$ , blue for subjects with  $VIQ < 90$ .  
146 Separately for left (left panel) and right (right panel) hemisphere (Left: low VIQ:  $n$  subjects = 7,  $n$  slices = 13, high  
147 VIQ:  $n$  subjects = 9,  $n$  slices = 22. Right: low VIQ:  $n$  subjects = 9,  $n$  slices = 25, high VIQ:  $n$  subjects = 6,  $n$  slices = 16).  
148 Here and further: black horizontal lines are median values; vertical lines are interquartile ranges. **d** L2/L3 cortical  
149 thickness positively correlates with VIQ in the left ( $n$  subjects = 16,  $n$  slices = 35,  $F(1,14) = 27.1$ ), but not in the right  
150 MTG ( $n$  subjects = 15,  $n$  slices = 41,  $F(1,13) = 1.87$ ). Here and further: error bars indicate SEM, shaded area  
151 represents 95% confidence bounds, insets show  $R^2$  and  $p$ -value. The blue and red data points correspond to the  
152 examples shown in **b**. **e** heatmap showing linear regression results ( $R^2$ ) for all cortical layers, both hemispheres,  
153 for Full Scale (FSIQ), verbal (VIQ) and performance (PIQ) IQ test scores.  $P$ -values are color-coded,  $*p < .05$ ;  $**p < .01$ .  
154 **f** Cortical thickness in MTG quantified from MRI scans, correlates with the MTG thickness from histological  
155 quantifications shown in **c** and **d**. Left panel shows an example of an MRI scan with white-gray matter boundaries  
156 highlighted with colored lines, MTG is marked orange, the resected area is marked red. MTG cortical thickness  
157 from MRI scans of the resected MTG positively correlates with total cortical thickness (middle,  $n$  subjects = 20,  $n$   
158 slices = 56,  $F(1,18) = 6.26$ ) and L2/L3 thickness (right,  $n$  subjects = 20,  $n$  slices = 56,  $F(1,18) = 8.1$ ) from histological  
159 analysis of the resected MTG.

160

161

## 162 **Thicker L2/L3 contains lower neuronal densities and larger cells**

163 Next, we asked how the expansion of L2/L3 would affect the overall microstructure of these layers.  
164 We hypothesized that a thicker L2/L3 would contain larger neurons that are dispersed over a greater  
165 volume to accommodate larger dendritic arbors. To analyze the microstructure of L2/L3, we performed  
166 NeuN (neuronal nuclei) antibody staining from human frontal, temporal and parietal cortices (left and  
167 right hemisphere) in an independent group of 16 neurosurgery subjects. As L2/L3 thickness shows great  
168 variability even within the same slice of the same subject, we measured cell densities and cell size in  
169 multiple regions of interest (ROIs) covering the whole slice (24 slices, 113 ROIs). Each ROI was manually  
170 selected to include only layers 2 and 3 (Fig. 2a). Similar to previously published data<sup>34</sup>, we find that  
171 neuronal density decreases from L2 to deeper L3, while the cell body area increases (Fig. 2b,c). In relation  
172 to layer thickness specifically, the neuronal density within sublayers is negatively associated with the  
173 average thickness of L2/L3: subjects with thicker L2/L3 had a less densely populated L3, and these  
174 correlations were especially large for deeper L3 (Fig 2 d,e). In addition, the cell body area positively  
175 correlated with the thickness of L2/L3. These results show that the expanded L2/L3 contain similar  
176 counts of neurons in L3, while their cell bodies are larger and more dispersed over a larger volume.

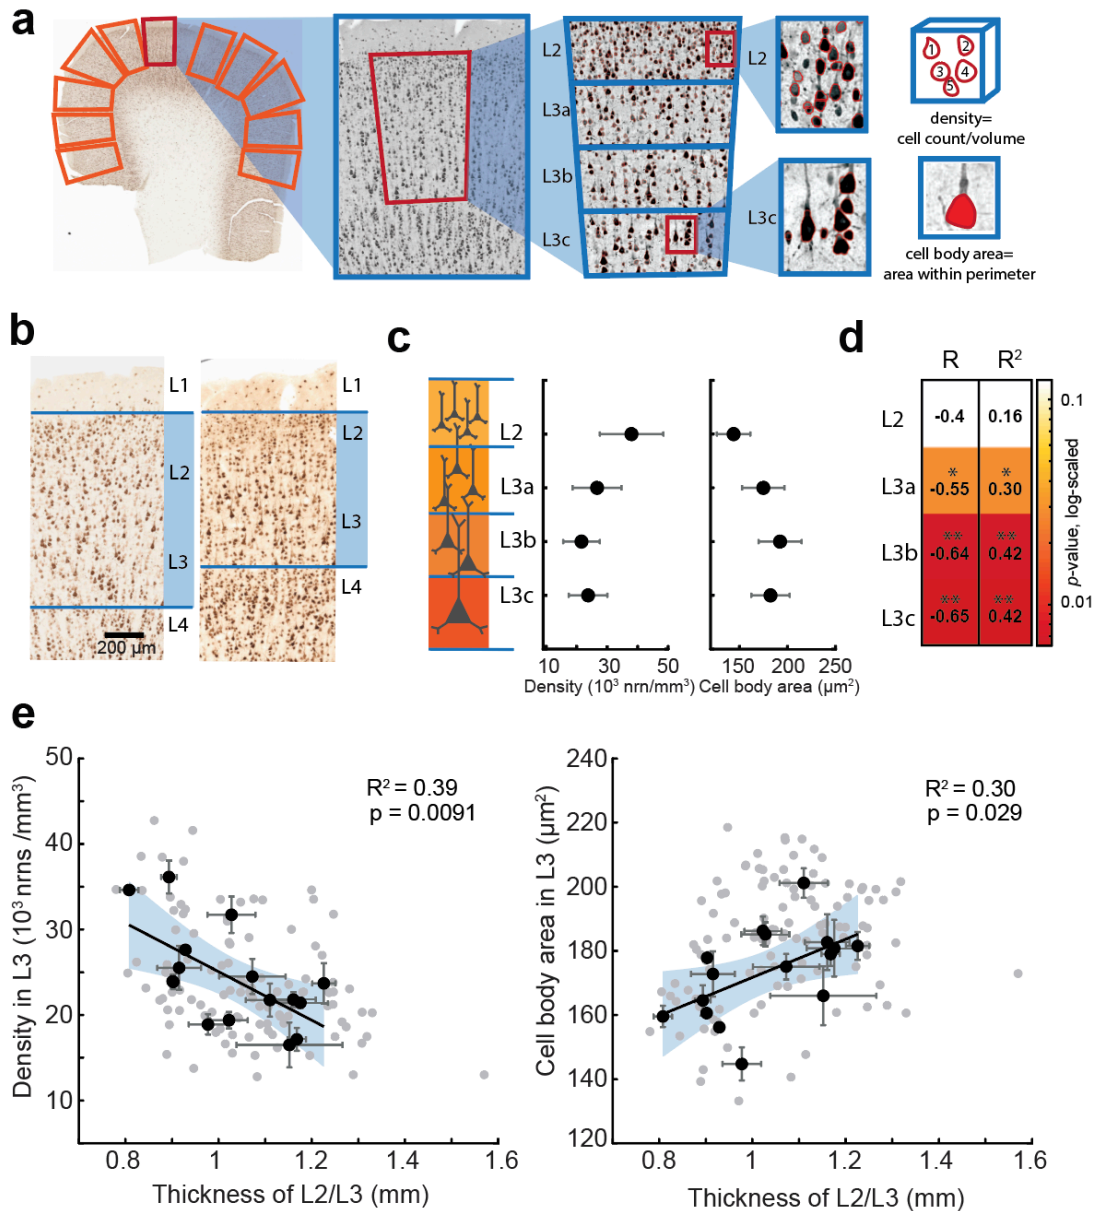

177  
178 **Figure 2. Expansion of L2/L3 in human cortex is accompanied by lower neuronal densities and larger cell body**  
179 **area in layer 3.**

180 **a** microstructure analysis workflow: in NeuN stained human cortical slice multiple ROIs were selected for analysis;  
181 within each ROI a region of interest was defined that included only L2/L3 and was divided in 4 sublayers of equal  
182 equal thickness (each at 25% of total L2/L3 thickness). The neurons were detected from the images using custom-made  
183 image-processing scripts (detected neurons are shown in red). **b** examples of NeuN stained slices from 2 subjects  
184 showing different L2/L3 thickness. **c** neuronal density decreases, and cell body area increases from L2 to deeper  
185 sublayers of L3 (black circles are mean data from 16 subjects; 24 slices, 113 ROIs). **d** results of neuronal density  
186 correlation to L2/L3 thickness per sublayer: neuronal density correlates stronger to L2/L3 thickness in deeper layer  
187 3: correlation coefficients (R) and variance explained (R<sup>2</sup>) are shown per sublayer, p-values are color coded (\*p-  
188 value<0.05; \*\*p-value<0.01). **e** thicker L2/3 shows negative association with neuronal density in L3 (F(1,14) = 9.15)  
189 and positive association with cell body area (F(1,14) = 5.88). black circles are means per subject, n=16, gray circles  
190 are ROIs, n=113, black lines are linear regression fits to subject level data, shaded area (blue) represents 95%  
191 confidence bounds.

192

193 **Subjects with higher VIQ have larger neurons with more complex dendrites**

194 Pyramidal cells are the principal computational units of the cortex and integrate information on  
195 their large dendrites spanning multiple layers<sup>12,34</sup>. We asked whether the thicker L2/L3 layers in the left  
196 MTG from the subjects with higher VIQ also contain larger pyramidal neurons, as our data on multiple  
197 cortical brain areas in Fig. 2 suggest. To this end, we quantified the cell body diameter from the biocytin  
198 filled neurons from L2/L3 in the left and right MTG slices as shown in Figure 1. The neurons from the left  
199 MTG in subjects with VIQ >90 had significantly larger cell bodies than those from subjects with lower  
200 VIQ, while in the right MTG the distributions of cell body diameters are similar between subjects with  
201 lower and higher VIQ scores. Thus, higher VIQ associates not only with the thicker L2/L3 (Fig.1), but these  
202 layers also contain pyramidal neurons with larger cell bodies in the left MTG (Fig. 3a).

203 We have previously shown that dendritic length and complexity of pyramidal cells positively associates  
204 with Full Scale IQ scores<sup>8</sup>. However, it is not known whether left-lateralization of verbal function also  
205 applies to the cellular level. To test whether the total dendritic length (TDL) of pyramidal neurons in  
206 L2/L3 from the left MTG correlates with VIQ scores, we selected neurons from Figure 3a with complete  
207 dendritic trees and fully reconstructed pyramidal morphologies from the left and right MTG. In line with  
208 our findings on layer thickness and cell body size, we observed a significant positive correlation between  
209 VIQ scores and TDL for pyramidal neurons in L2/L3 in the left and not right MTG from these subjects (Fig.  
210 3c). Moreover, VIQ scores also correlated with the number of branches on basal dendrites in these  
211 neurons (Fig. 3c), indicating that the larger dendrites in the subjects with higher VIQ are also more  
212 complex and the observed correlation with TDL is not only due to a longer apical shaft in deeper lying  
213 neurons. After controlling for age and gender, TDL also correlated with FSIQ, but not PIQ (Supplementary  
214 Fig. 3a), showing that neuronal structure in the left MTG is specifically associated with verbal cognition.  
215 Furthermore, TDL did not correlate significantly with age of the subjects and was not different between  
216 male and female subjects (Supplementary Fig. 3b-c).

217 Dendritic length is closely related to the location of the cell soma within cortex and deeper lying  
218 cells generally have larger dendrites<sup>5,35</sup>. As subjects with higher VIQ have thicker total cortex, their  
219 pyramidal cells are on average located deeper than those from subjects with lower VIQ (Fig. 3d) and  
220 individual VIQ scores correlated with neuronal depth (Supplementary Fig. 4). To ensure that the  
221 difference in TDL was not simply the result of recording from deeper neurons in high VIQ patients, we  
222 corrected neuron depth for total cortical thickness. The relative depth of these cells within the layer was  
223 not different (Low VIQ Median(IQR) = 0.49(0.30-0.58), High VIQ = 0.62(0.51-0.79),  $p = 0.22$ ) (Fig. 3d right  
224 panel) and did not correlate with VIQ scores ( $R^2=0.31$ ,  $p=0.097$ , Supplementary Fig. 4), indicating that  
225 the cells from both groups were recorded at similar relative depths within the layers. Thus, our results  
226 show that the expansion of the L2/L3 in the left MTG is accompanied by the elongation of pyramidal cell  
227 dendrites in these layers and both associate with human verbal intelligence. Longer and more complex  
228 dendrites may endow the pyramidal cells with a larger dendritic surface for forming synaptic connections,  
229 and allow separate branches of the dendritic tree to act as independent computational compartments  
230 increasing the complexity of information processing<sup>10,12</sup>.

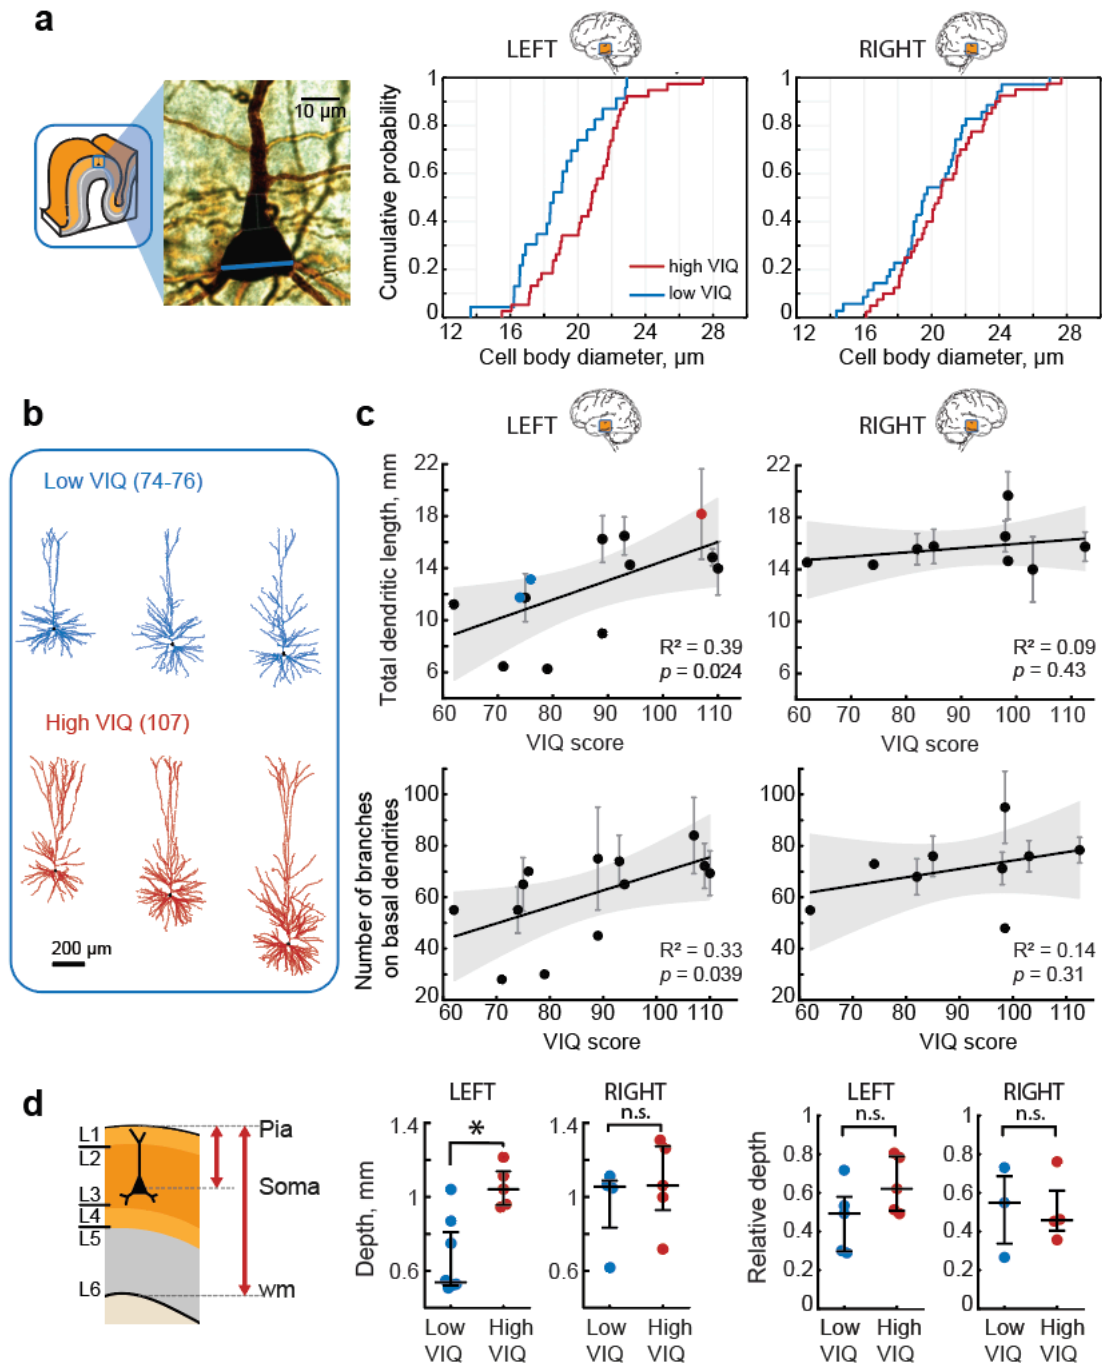

231  
232 **Figure 3. Total dendritic length (TDL) of pyramidal cells L2/L3 from the left, but not the right MTG associates with**  
233 **higher VIQ scores.**

234 **a** subjects with higher VIQ had larger pyramidal neurons in L2/L3: example image of a biocytin stained pyramidal  
235 neuron with soma diameter marked with blue line (left), the cumulative distribution function for all pyramidal  
236 neuron diameters in subjects with high VIQ and low VIQ for left (middle panel, n cells low VIQ=23, n cells high VIQ=  
237 38, Mann-Whitney U test:  $U=268$ ,  $p=0.011$ ) and right MTG (right panel, n cells low VIQ=35, n cells high VIQ= 40,  
238  $U=606$ ,  $p=0.32$ ).

239 **b** Examples of fully reconstructed pyramidal neuronal morphologies (left MTG, L2/L3) from two subjects with low  
240 VIQ and one subject with high VIQ scores. **c** VIQ scores positively correlated with TDL (upper panel) and the  
241 number of branches (lower panel) on basal dendrites from pyramidal neurons in L2/L3 in the left (n subjects = 13, n cells =  
242 33, TDL:  $F(1,11) = 6.89$ , number of branches:  $F(1,11) = 5.51$ ), but not in the right MTG (n subjects = 9, n cells = 30,  
243 TDL:  $F(1,7) = 0.7$ , number of branches:  $F(1,7) = 1.19$ ). Error bars indicate SEM, shaded area (gray) represents 95%



244 confidence bounds. The blue and red data points correspond to the examples displayed in a. **d** Cells from both  
245 groups were recorded at similar relative depths when correcting for cortical thickness Left panel: schematic  
246 showing depth of the cell as the distance from pia to soma. Relative depth was calculated as depth divided by  
247 distance from pia to white matter. Middle panel: only in the left MTG neurons recorded from subjects with higher  
248 VIQ scores were located deeper in the cortex than those from subjects with lower VIQ (Left: low VIQ Median (IQR)=  
249 0.537(0.523-0.810) mm, n subjects = 8, n cells = 13, high VIQ = 1.042(0.957-1.139) mm, n subjects = 5, n cells = 20,  
250 U = 38, p = 0.006. Right: low VIQ = 1.056(0.833-1.088) mm, n subjects = 4, n cells = 11, high VIQ = 1.062(0.929-  
251 1.274) mm, n subjects = 5, n cells = 19, Mann-Whitney U test: U = 18, p = 0.73). Right panel: Relative depths of the  
252 recorded cells was not different (Left: low VIQ = 0.49(0.30-0.58), n subjects = 5, n cells = 9, high VIQ = 0.62(0.51-  
253 0.79), n subjects = 5, n cells = 15, U = 21, p = 0.22. Right: low VIQ = 0.55(0.34-0.69), n subjects = 3, n cells = 8, high  
254 VIQ = 0.46(0.41-0.61), n subjects = 4, n cells = 11, U = 12, p = 1). wm: white matter.

255

256

257

### 258 **Neurons from subjects with higher VIQ maintain fast action potentials**

259 Dendritic tree size directly influences action potential (AP) firing of pyramidal neurons<sup>7,8</sup>. It speeds  
260 up AP kinetics, increases the AP onset rapidity and allows large pyramidal neurons to better time-lock  
261 AP firing to synaptic inputs<sup>8</sup>. Moreover, human pyramidal neurons from subjects with higher Full Scale  
262 IQ scores are able to maintain faster rise speeds during sustained firing. As larger TDL in pyramidal  
263 neurons from L2/L3 in the left MTG supports higher VIQ, we asked whether these neurons are also able  
264 to sustain faster AP kinetics. We performed patch-clamp recordings and recorded action potentials at  
265 different instantaneous frequencies and quantified their rise speeds (Fig 4a). We observed similar  
266 lateralization towards the left MTG: pyramidal cells in L2/L3 in the left MTG from subjects with higher  
267 VIQ scores fired APs with faster rise speeds at 21-40 Hz than those of subjects with lower VIQ. We did  
268 not observe any significant differences between VIQ groups in AP rise speeds of neurons from the right  
269 MTG (Fig. 4b,c). Finally, average AP rise speeds at 21-40 Hz positively correlated with VIQ in the left, but  
270 not in the right MTG (Fig. 4d). We checked whether one high value of AP rise speed (marked red in Fig  
271 4d) biased the results. After excluding this data point from the regression analysis, the correlation  
272 remained strong and significant ( $R^2=0.67$ ,  $p=0.007$ ). After controlling for age and gender, AP rise speeds  
273 also correlated with FSIQ, but not PIQ (Supplementary Fig. 3a). Furthermore, AP rise speeds did not  
274 correlate significantly with age of the subjects and were not different between male and female subjects  
275 (Supplementary Fig. 3b-c). Thus, subjects with higher VIQ (and FSIQ) have larger pyramidal neurons in  
276 L2/L3 of the left MTG that are able to sustain fast action potential (AP) rise speed during high frequency  
277 firing. These findings are in line with our expectation, since AP kinetics are directly influenced by  
278 dendritic morphology, where larger dendrites lead to faster AP onsets<sup>7,36</sup>.

279

280

281

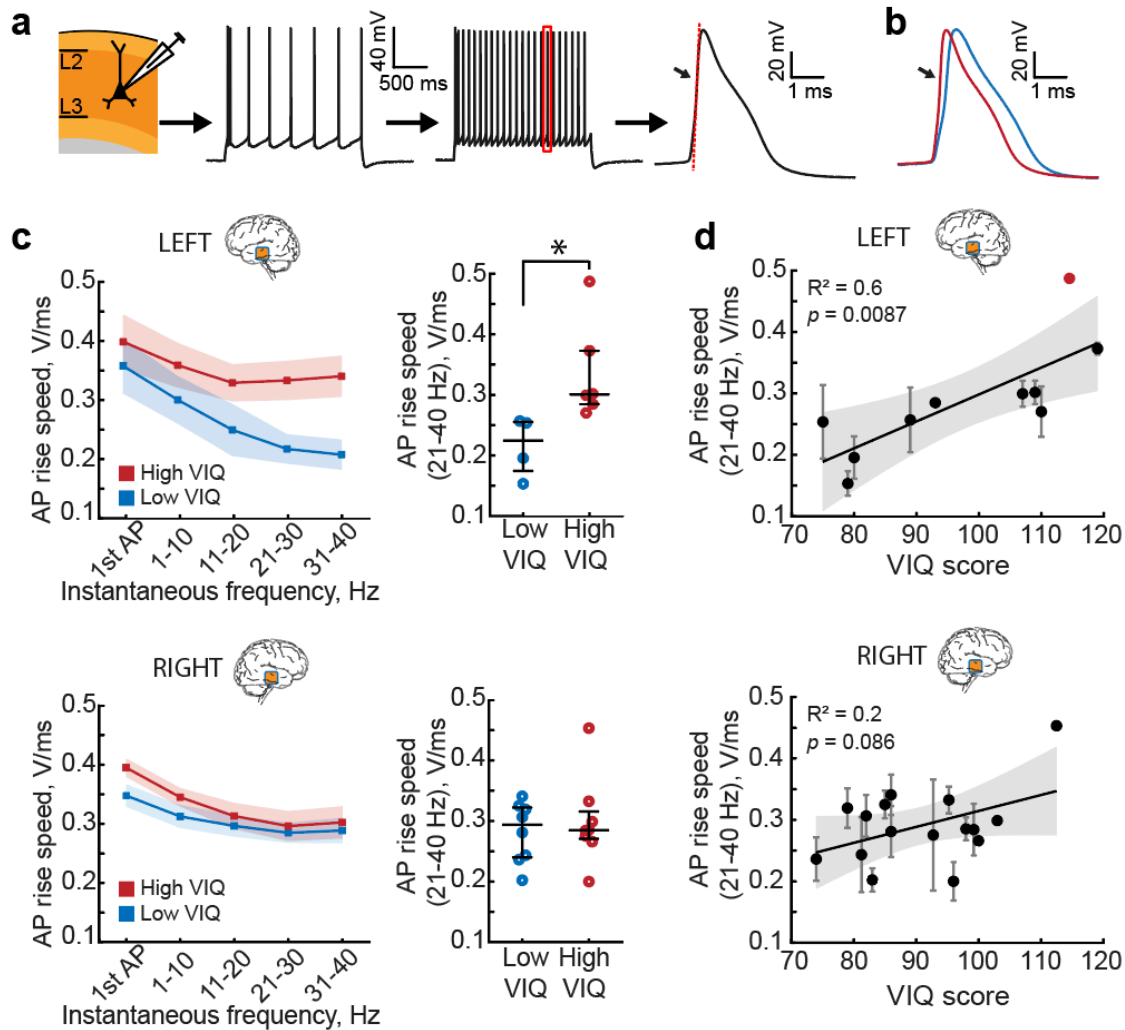

282  
283 **Figure 4. Left MTG pyramidal neurons in L2/L3 from subjects with higher VIQ scores are able to sustain fast action**  
284 **potential (AP) rise speed during high frequency firing.**

285 **a** Depolarizing current steps were injected in pyramidal neurons in L2/L3. APs were sorted based on instantaneous  
286 firing frequency. AP rise speed was defined as the maximum speed of the rising phase of the AP (red dotted line).  
287 **b** Example AP traces at 30 Hz from two subjects with low and high VIQ. **c** At higher frequencies, the AP rise speed  
288 is faster in neurons from subjects with higher VIQ (red), and slower in subjects with lower VIQ (blue) only in the  
289 left MTG. Shaded area represents SEM. Each data point represents an average of APs from several per subject (Left  
290 MTG, Low VIQ Median (IQR) = 224.61(174.41-255.27) mV/ms, n subjects = 4, n cells = 15, High VIQ = 300.52(284.87-  
291 372.79) mV/ms, n subjects = 6, n cells = 16 Mann Whitney U test:  $U = 10$ ,  $p = 0.0095$ . Right MTG, Low VIQ =  
292 293.79(239.81-322.17) mV/msn subjects = 8, n cells = 36, High VIQ = 284.80(270.60-315.65) mV/ms, n subjects =  
293 8, n cells = 29,  $U = 67$ ,  $p = 0.96$ ). **d** AP rise speeds at higher frequencies correlate with VIQ scores only in the left  
294 MTG (n subjects =10, n cells = 31,  $F(1,8) = 11.9$ ), but not in the right MTG (n subjects =16, n cells = 65,  $F(1,14) =$   
295 3.42). After removal of the outlier (marked in red) from the analysis, the correlation remained significant ( $R^2 = 0.67$ ,  
296  $p = 0.007$ ,  $F(1,7) = 14.3$ ).

297  
298  
299 **Discussion**

300 Our findings point to a crucial role of supragranular layers and their pyramidal cells in human  
301 verbal cognition. These results are the first to link cortical micro-organization and cellular properties in  
302 the left MTG to a specific cognitive function this area performs – verbal intelligence. Cortical thickness is

303 one of the most robust neurobiological correlates of human intelligence, and especially the left temporal  
304 cortex in particular shows the highest correlations to general and verbal intelligence<sup>14,15,37–42</sup>. On the  
305 contrary, dementia and cognitive impairment are accompanied by cortical thinning in larger areas of  
306 frontal and temporal lobes<sup>43,44</sup>. Our findings demonstrate that the overall increase in cortical thickness  
307 observed in subjects with higher intelligence can be specifically attributed to the expansion of cortical  
308 L2/L3. These upper cortical layers are relatively more expanded in humans compared to other species<sup>1</sup>.  
309 They are generated late in neurogenesis, and are favored by the longer period of human neurogenesis  
310 that adds novel neurons to the cortex<sup>45,46</sup>. The increase in cortical surface area in humans may reflect  
311 the evolutionary shift towards increased numbers of intermediate progenitor cells<sup>47</sup>. Such intermediate  
312 cell division would produce large numbers of neurons of the same subtype in the superficial layers and  
313 lead to warping of the cortical surface and gyration of the human cortex<sup>47</sup>. In line with this, single-cell  
314 RNA sequencing of human MTG shows that most cells in L2/L3 surprisingly map to few transcriptomic  
315 excitatory types and are largely dominated by one type – EXC L2-3 LINC00607 FREM3<sup>29</sup>, thus supporting  
316 the role of this cell type as a principal computational unit generated by prolonged intermediate  
317 progenitor cell division in these layers. Our finding that L2/L3 expansion correlates to increased VIQ  
318 highlights that these evolutionary late additions may support better performance in verbal cognition.

319 The L2/L3 pyramidal cells receive rich cortico-cortical projections and have many re-excitatory  
320 connections<sup>48</sup> that they collect on their vast dendrites. In rodents they were shown to pre-amplify  
321 information<sup>49</sup> in motor cortex and induce gain modulation of deeper layer inputs in sensory cortex of  
322 rodents. This amplifying role might be even more important in multi-modal association cortices where  
323 multiple inputs have to be integrated. Deep L3 neurons have a unique pattern of dendritic maturation  
324 and have the most protracted period of developmental plasticity<sup>50</sup>. They seem to be especially  
325 vulnerable and deteriorate in Alzheimer disease possibly because of their suggested role in cortico-  
326 cortical projections<sup>44</sup>. Our findings corroborate the idea that their loss may substantially diminish the  
327 effectiveness of the distributed processing capacity of the neocortex.

328 Our results suggest that human higher cognitive functions are not only associated with a larger  
329 number of computational units, but rather with an increase in size and complexity of the individual  
330 components, the neurons. We show that individuals with higher verbal IQ scores have cells with more  
331 elaborate dendrites. This might endow pyramidal neurons with several advantages for fast and efficient  
332 computation. Firstly, large dendrites can physically contain more synaptic contacts and process more  
333 information. Secondly, separate branches of the dendritic tree can act as independent computational  
334 compartments and increase the complexity of information processing<sup>10,12</sup>. These cells would need a  
335 larger volume to accommodate their vast dendrites, and thus spread more as the cortical volume  
336 expands leading to lower neuronal densities. Indeed, lower values of dendritic density were found to be  
337 associated with higher intelligence in healthy individuals<sup>51</sup>. Across the brain regions, a gradient of  
338 dendritic complexity follows the function of cortical areas<sup>2,34,52</sup>. Primary sensory cortices tend to have  
339 lower dendritic complexity, whereas areas involved in high-level integrative processes, contain neurons  
340 with larger and more complex dendrites in L2/L3<sup>2,34,52</sup>. As human language is built from complex  
341 hierarchically arranged structures<sup>53</sup> such as sentences, phrases, and words, it was suggested that the  
342 tree-like language structures are reflected in the tree-like structure of brain's computational units –  
343 neurons and their dendrites<sup>54</sup>.

344 In addition to longer dendrites, changes in the signaling speed of individual neurons must add up  
345 to increase the overall computational power of the brain. Fast signaling in the brain is a crucial  
346 requirement for efficient processing of information, and distributed brain areas of intelligence need fast  
347 signaling to coordinate their activity. Indeed, IQ scores in large groups of subjects robustly correlate with

348 reaction times even in very simple tasks, suggesting an underlying mental speed factor<sup>55</sup>. Our results  
349 provide a cellular explanation for such mental speed: we show that neurons of individuals with higher  
350 verbal IQ are able to sustain action potentials with more stable fast rise times. One of the computational  
351 consequence of the ability of neurons to maintain fast onsets of action potentials is the gain in synaptic  
352 resolution<sup>4</sup>. In the brain, neurons are constantly bombarded by multiple incoming synaptic inputs that  
353 they need to process, filter or pass on. The ability of the neuron to resolve and react to fast-changing  
354 synaptic inputs depends on how fast it can generate APs<sup>8</sup>. Thus, faster AP kinetics and better time-  
355 locking of AP output to synaptic inputs allow large pyramidal neurons to more rapidly integrate, process  
356 and convey larger amounts of synaptic information.

357 The firing rates of human neurons observed in vivo indicate that maintaining fast action potentials  
358 might be especially relevant during cognitive tasks. Extracellular recording in single neurons in temporal  
359 cortex during awake craniotomy for epilepsy typically show very low baseline firing rates of <1 Hz.  
360 However, during verbal tasks, such as word pair associations learning, these neurons show task-specific  
361 shifts in their levels of activity that can last for minutes (average increase of 6-9 Hz) and can increase  
362 their activity to 30-50 Hz during specific behavioral tasks<sup>25,26,56-58</sup>. These recordings were done in the  
363 same cortical area as in our study and highlight the relevance and validity of sustained high frequency  
364 firing of MTG neurons during cognitive tasks. The ability of neurons to maintain fast kinetics of APs during  
365 such sustained firing can give them an advantage in tracking fast changing synaptic inputs.

366 Our dataset is a unique combination of cognitive scores, structural MRI, histological assessment  
367 and single neuron measurements, however, our method has several limitations. The cortical tissue  
368 comes from subjects who undergo neurosurgery as part of their treatment for intractable epilepsy or  
369 brain tumor. Although we only use access tissue that is not part of the epileptic focus or tumor, we  
370 cannot completely rule out the influence of the disease or medication on verbal intelligence and cellular  
371 parameters. The VIQ scores from subjects in our sample are on average 90 (range 62-119), which is  
372 substantially lower than in healthy population (100). However, we do not find any correlation of VIQ  
373 scores with any of the disease history parameters, such as frequency of seizures, disease duration, and  
374 disease onset (Supplementary table 2). Furthermore, to make sure the tissue is not pathological we  
375 checked the integrity and layer structure after histological staining and controlled single cell recordings  
376 for epileptiform activity. In addition, we correlated all parameters to patients' disease history (frequency  
377 of seizures, disease duration, and disease onset, Supplementary table 2) and found no correlations with  
378 the parameters reported in this study. Finally, we and others repeatedly demonstrated that using access  
379 tissue samples, we are able to study non-pathological properties of human circuits<sup>4,6,8,27,30,32,59-61</sup>.

380 Another limitation of our study is that all specific cognitive test results are highly correlated and  
381 to a large degree measure the underlying common factor, general intelligence<sup>15</sup>. This makes it difficult  
382 to disambiguate the unique effects of verbal and non-verbal cognitive functions. As intellectual  
383 performance is measured by FSIQ scores that are derived from verbal (VIQ) and performance IQ (PIQ),  
384 all associations of cortical architecture with VIQ inevitably will also be present with FSIQ. In our data  
385 both PIQ and VIQ highly correlate with FSIQ (correlation coefficient of FSIQ to VIQ is .907 and of FSIQ to  
386 PIQ is .902). Furthermore, performance and verbal IQ are also interrelated (in our data set correlation  
387 coefficient of VIQ to PIQ is 0.698) and share a large proportion of total variance. Thus, all associations  
388 we find of cortical parameters with verbal intelligence are similar to associations with general  
389 intelligence (measured by FSIQ).

390 We emphasize the association of cortical and neuronal properties to verbal intelligence primarily  
391 based on the well-documented function of the left MTG in verbal cognition. The dominant role of the  
392 left temporal lobe in verbal ability is supported by a large body of evidence from lesion studies, semantic

393 dementia patients, findings from studies of commissurotomy patients and cortical mapping during  
394 awake neurosurgery<sup>19,20,62,63</sup>. Lesions at specific locations in the left temporal lobe selectively impair  
395 specific categories of verbal reasoning such as naming of objects, tools, living things and personal names,  
396 while lesions in the right temporal lobe have much less impact on these functions<sup>64</sup>. Moreover, verbal  
397 intelligence was shown to have strong structural correlates, such as cortical thickness, exclusively in the  
398 left temporal lobe, while functional correlates seem to be more symmetrically distributed<sup>14</sup>. Consistent  
399 with this, our findings show that the increase in cortical thickness goes hand in hand with specific  
400 changes in superficial layers of the left temporal cortex: increased layer 2 and 3 thickness, larger  
401 dendrites, larger cell body size and decreased cell density. Furthermore, we find that variance explained  
402 ( $R^2$ ) is consistently higher for linear regressions on VIQ than on PIQ. When we control for age and gender  
403 using partial correlations, the correlation coefficients for PIQ to neuronal parameters lose their statistical  
404 significance, while VIQ and FSIQ both remain high and significant (Supplementary Fig. 3). This  
405 strengthens our conclusions that the observed effects are due to the involvement of left MTG neurons  
406 in primarily verbal aspects of intelligence.

407 In conclusion, our results are the first to link cortical micro-architecture of the left temporal lobe  
408 and its large and fast pyramidal neurons with verbal cognition. Our results suggest that the increased  
409 size and complexity of human neurons in these superficial layers might contribute to cortical expansion  
410 and increased human cognitive ability.

411  
412  
413

## 414 **Methods**

### 415 Human subjects and brain tissue

416 All procedures were approved by the Medical Ethical Committee of the VU University Medical  
417 Center, and in accordance with the declaration of Helsinki and Dutch license procedures. All subjects  
418 provided written informed consent for the use of data and tissue for scientific research. All data were  
419 anonymized.

420 Human cortical brain tissue was resected during neurosurgery in order to gain access to deeper  
421 pathological brain structures, typically hippocampus or amygdala. The cortical tissue originated from  
422 middle temporal gyrus (MTG, Brodmann area 21). Functional mapping was used to prevent the resection  
423 of speech areas. Subjects underwent surgery for the treatment of mesial temporal sclerosis, removal of  
424 hippocampal tumor, low grade hippocampal lesion, cavernoma, or otherwise unspecified medial  
425 temporal lobe pathology. Non-pathological cortical tissue was obtained from 59 subjects (28 males, 31  
426 females; age 18-66 years; 26 left hemisphere and 33 right hemisphere resections). Cortical thickness was  
427 measured in 91 slices from 36 of these subjects. From 25 subjects, full morphological reconstructions of  
428 71 neurons were obtained. Action potentials were recorded in 149 neurons from 35 subjects.

429 In all subjects, the resected neocortical tissue was not part of the epileptic focus or tumor and was  
430 removed to access deeper lying structures. We and others<sup>27-29</sup> have repeatedly demonstrated that using  
431 access tissue samples, one can study non-pathological properties of human circuits<sup>4,6,8,30-32</sup>. We  
432 observed no correlations of cellular parameters or cognitive scores with the subject's disease history and  
433 age (Supplementary Table 2). All anatomical, morphological and physiological data was collected and  
434 analyzed while blind to the subjects' IQ scores.

435 All primary data analyses were performed blind to the cognitive tests scores of the subjects. These  
436 analyses include extraction of cortical thickness from MRI, histological staining, layer thickness  
437 quantification, cell body size and density measurements, cell body diameter measurement from biocytin  
438 stained neurons, morphological reconstructions of dendritic structure, and action potential feature  
439 extraction from electrophysiological recordings. All statistics reported in the study were performed by  
440 researchers who were not involved in the primary data analysis or IQ quantification.

441

### 442 IQ scores

443 Full Scale IQ (FSIQ; for 58 subjects), verbal IQ (VIQ; for 50 subjects) and performance IQ (PIQ; for  
444 51 subjects) scores were obtained using the Dutch version of the Wechsler Adult Intelligence Scale-III  
445 (WAIS-III) or WAIS-IV. The tests were typically administered within a short time before surgery as part of  
446 a neuropsychological examination. Cognitive tests were performed in the clinical setting and quantified  
447 by the clinical neuropsychologists as part of the diagnostic procedure prior to surgery. The IQ scores are  
448 calculated based on performance on the following subtests: vocabulary, similarities, information,  
449 comprehension, arithmetic, digit span, and letter-number sequencing for VIQ; picture completion, block  
450 design, matrix reasoning, digit symbol-coding, and symbol search for PIQ. For FSIQ, performance on all  
451 subtests is aggregated.

452

### 453 Slice preparation

454 Immediately after surgical resection, the cortical tissue was transferred to carbogenated ice-cold  
455 artificial cerebrospinal fluid (aCSF) containing (in mM): 110 choline chloride; 26 NaHCO<sub>3</sub>; 10 D-glucose;  
456 11.6 sodium ascorbate; 7 MgCl<sub>2</sub>; 3.1 sodium pyruvate; 2.5 KCl; 1.25 NaH<sub>2</sub>PO<sub>4</sub>; and 0.5 CaCl<sub>2</sub> (300 mOsm)  
457 and transported to the laboratory. The time between resection of the tissue and the start of preparing  
458 slices was less than 15 minutes. After manual removal of the pia 350 µm-thick cortical slices were

459 prepared in the same ice-cold solution used for transport and described above. After slicing, the slices  
460 were transferred to holding chambers filled with aCSF, containing (in mM): 125 NaCl; 3 KCl; 1.2 NaH<sub>2</sub>PO<sub>4</sub>;  
461 1 MgSO<sub>4</sub>; 2 CaCl<sub>2</sub>; 26 NaHCO<sub>3</sub>; 10 D-glucose (300 mOsm), and bubbled with carbogen gas (95% O<sub>2</sub>/5%  
462 CO<sub>2</sub>). The slices were stored in the holding chambers for 30 minutes at 34 °C, and at least 30 minutes at  
463 room temperature prior to recordings.

464

#### 465 Electrophysiological recordings

466 Cortical slices were placed in a recording chamber with a continuous flow of oxygenated aCSF. All  
467 experiments were performed at 32-35 °C. Infrared differential interference microscopy (IR-DIC; BX51WI  
468 microscope, Olympus) was used to visualize neurons within the slices. Patch pipettes (3-5 MΩ) were  
469 filled with intracellular solution (ICS) containing (in mM): 110 K-gluconate; 10 KCl; 10 HEPES; 10 K-  
470 phosphocreatine; 4 ATP-Mg; 0.4 GTP; pH adjusted to 7.3 with KOH; 285-290 mOsm; 5 mg/ml biocytin.  
471 After establishing whole cell configuration, membrane potential responses to depolarizing current  
472 injection steps (30-50 pA step size) were recorded. Recordings were sampled at frequencies of 10 to 50  
473 kHz and lowpass filtered at 10 to 30 kHz using Multiclamp 700A/B amplifiers (Axon Instruments).  
474 Recordings were digitized with an Axon Digidata 1440A, acquired with pClamp software (Axon) and later  
475 analyzed offline using custom-written scripts in MATLAB (R2019b, Mathworks).

476

#### 477 Morphological analysis

478 Cells were loaded with (0.5%) biocytin present in the ICS during electrophysiological recordings.  
479 Afterwards, the slices were fixed in paraformaldehyde (PFA, 4%) and the recorded cells were stained  
480 with the chromogen 3,3-diaminobenzidine tetrahydrochloride (DAB) using the avidin-biotin-peroxidase  
481 method. Next, the slices were mounted on glass microscope slides and embedded in mowiol underneath  
482 a glass coverslip. Successfully stained neurons with clear cell body contours were used for cell body  
483 diameter quantification. The cell bodies were imaged using Surveyor Software (Chromaphor,  
484 Oberhausen, Germany) with a x 100 oil objective. These images were analysed in ImageJ. The soma  
485 diameter was measured as the maximum distance from side to side at the base of the cell body, as a line  
486 perpendicular to the direction of apical dendrite. A sub-selection of these biocytin stained neurons was  
487 selected for dendritic reconstruction. This selection was based on uniform biocytin signal, presence of  
488 complete dendrites without obvious slicing artefacts, and apical dendrite reaching to layer 1. These  
489 selected neurons were digitally reconstructed using NeuroLucida software (MicroBrightfield) and a 100x  
490 oil objective (Olympus). After reconstruction, morphologies were checked for accurate reconstruction in  
491 x/y/z planes for presence of unconnected, missed or incompletely reconstructed dendrites. Finally,  
492 reconstructions were crosschecked by an independent researcher for false-positive/false-negative  
493 dendrites using an overlay in Adobe Illustrator between the NeuroLucida reconstruction and Z-stack  
494 projection image from Surveyor Software (Chromaphor, Oberhausen, Germany), as reported previously  
495 in<sup>5</sup>.

496 L2/L3 pyramidal neurons were identified based on morphological and electrophysiological  
497 properties, somatic depth and position within layers from DAPI stained slices. The morphological  
498 reconstructions for these cells that passed the quality control were then used to extract the total  
499 dendritic length (TDL) and number of branches on basal dendrites.

500

#### 501 Cortical thickness measurements

502 To determine cortical thickness, the fixated cortical slices that were previously recorded from,  
503 were stained with 4',6-diamidino-2-phenylindole (DAPI) and remounted. The intensity of the

504 fluorescence is an indication of the density of cell bodies within the cortical slice. This allowed us to  
505 differentiate the different cortical layers. Normal light and fluorescent images were taken using  
506 NeuroExplorer software (Microbrightfield). The outlines of cortical layers were tracked in ImageJ  
507 software. The cortical thickness and layer thickness were measured along radially drawn lines, parallel  
508 to fiber tracks, apical dendrites and blood vessels visible in the tissue. The lines were drawn by an  
509 independent experienced researcher to minimize errors and bias. Since no clear distinction can be made  
510 with DAPI between layers 2 and 3, and between layers 5 and 6, we treated L2/L3 and L5/L6 as single  
511 regions in the analysis. Cortical thickness varies between gyri and sulci in the cortex. Therefore, we only  
512 measured cortical thickness in the gyral crown. Cortical slices that did not clearly contain gyral crown  
513 were excluded. Cortical slices that were cut at an angle to the pia-white matter axis were identified by  
514 slicing artifacts and unclear borders between cortical layers and excluded from the analysis.

515

#### 516 MRI scans and cortical thickness analysis

517 T1-weighted brain images (1 mm thickness) were acquired with a 3T MR system (Signa HDxt,  
518 General Electric, Milwaukee, Wisconsin) as a part of pre-surgical assessment, the scans were analyzed  
519 using the Freesurfer image analysis suite (<http://freesurfer.net>)<sup>65</sup>, previously reported in<sup>8</sup>. Calculation  
520 of the cortical thickness was done as the closest distance from the grey/white boundary to the grey/CSF  
521 boundary at each vertex and was based both on intensity and continuity information from the entire  
522 three-dimensional MR volume. Neuroanatomical labels were automatically assigned to brain areas  
523 based on Destrieux cortical atlas parcellation as described in<sup>66</sup>. Middle temporal gyrus was selected  
524 based on Destrieux cortical atlas parcellation in the hemisphere where the resected tissue originated.  
525 Cortical thickness at each vertex in this selected area was averaged for each subject.

526

#### 527 Cortical microstructure analysis from NeuN stained slices

528 Several slices (1-3 per subject) were fixed in paraformaldehyde (PFA, 4%) for 48 hours, transferred  
529 to phosphate buffer solution PBS + sodium azide. Slices were then cryoprotected in 30% sucrose, frozen  
530 and re-sectioned at 30  $\mu$ m using a sliding microtome (Leica SM2000R). Tissue slices were stained using  
531 the Biocare Intellipath FLX slide staining automated platform. All NeuN tissue sections were pre-  
532 mounted onto gelatin coated slides, the day prior to IHC staining and first allowed to dry flat for 30-60  
533 minutes, then were briefly rinsed in Milli-Q water. All slides were placed in 37°C oven overnight prior to  
534 IHC staining the following day. At the day of staining, slides were peroxidase blocked in Biopcare 1X TBS  
535 wash buffer (Biocare # TWA945M), endogenous peroxidase activity was blocked using 3% hydrogen  
536 peroxidase in 1X TBS wash buffer. All slides underwent Heat Induced Epitope Retrieval (HIER) methods,  
537 in 98°C Sodium Citrate buffer, pH6.0 for 20 minutes, then allowed to cool at room temperature for 20  
538 minutes. Next, slides were rinsed in Milli-Q water and equilibrated using 1X TBS buffer, loaded onto the  
539 Biocare IntelliPath FLX<sup>®</sup> Slide Stainer and incubated on IntelliPath Staining Platform using the following  
540 conditions: incubation for 10 minutes in IntelliPath Background Punisher (Biocare# IP974G20), then  
541 application of 0.5 $\mu$ g/ml (1:2000) of NeuN mouse primary antibody (clone A60, Millipore- MAB377) in  
542 Biocare Renaissance Background Reducing Diluent (Biocare #PD950L) for 75 minutes. Next, tissue  
543 sections were rinsed in 1X TBS wash buffer and treated with Biocare Mouse Secondary reagent (Mach4  
544 kit (IPK5011 G80)) for 10 minutes, then washed in 1X TBS buffer, followed by incubation in iBiocare  
545 Universal HRP Tertiary reagent (#IPK5011 G80) for 15 minutes then rinsed in 1X TBS wash buffer. All  
546 sections were developed using a mixture of Chromogen IP FLX DAB (IPK5011 G80) and Biocare DAB  
547 Sparkle (Biocare # DS830M) applied for 1 minute. Upon autostainer run completion, all slides were



548 unloaded into Milli-Q water, dehydrated through a series of graded alcohols, cleared in Formula 83, and  
549 coverslipped with DPX for final detection of stained neurons.

550 Subsequently, the images of stained subsections were acquired with 20x air on Aperio microscope  
551 at a resolution of 1  $\mu\text{m}$  to 1 pixel. The quantification of cell densities and cell body sizes was performed  
552 by using custom-made MATLAB scripts (R2019b, Mathworks). Within each subsection, regions of interest  
553 (ROIs) were selected manually covering the whole slice. The border between L1 and L2 was visually  
554 identified as a characteristic sharp increase in cell body size and density, L3 to L4 border was identified  
555 at the transition from large L3 cells to 3-fold smaller L4 cell bodies. Each ROI was selected as a trapezoid  
556 with bases along the border between L1 and L2 (upper base, 500-700  $\mu\text{m}$  in length), the border between  
557 L3 and L4 (lower base, 500-700  $\mu\text{m}$  in lengths) and the sides parallel to the apical dendrites. The L2/L3  
558 thickness was calculated for each ROI separately (mean length of the sides) and each ROI was split in 4  
559 sublayers (L2, L3a, L3b and L3c defined as 25% of the L2/L3 thickness). We validated MATLAB scripts by  
560 manually quantifying neuronal parameters from ROIs from 15 slices, the manual quantification was  
561 similar to the automated quantification (average cell density quantified manually  $27010 \pm 3592$   
562 neurons/ $\text{mm}^3$ , quantified with MATLAB scripts  $26595 \pm 4649$  neurons/ $\text{mm}^3$ ).

563

#### 564 Statistical analysis

565 Statistical significance of relationships between parameters was determined using linear  
566 regression. Since multiple cells or slices were measured per subject, parameters were first averaged per  
567 subject before statistical testing. Differences between groups were tested for significance using the non-  
568 parametric two-sided Mann-Whitney U test. Corrections for multiple testing were performed according  
569 to the Benjamini-Hochberg False Discovery Rate procedure. All statistical analysis was performed using  
570 Matlab (R2019a, Mathworks). Partial correlations controlling for the effects of age and gender were  
571 computed using SPSS 26 (IBM).

572

#### 573 **Data availability**

574 Source data are provided with this paper. To protect the privacy of the subjects in this study, subject  
575 numbers have been randomized in Supplementary Table 1, and the source data for Supplementary Table  
576 2 and Supplementary Fig. 3 are only available upon request from the corresponding author (NAG).

577

#### 578 **Code availability**

579 All customized Matlab scripts used for physiological feature extraction are available at  
580 <https://github.com/INF-Rene/Morphys>.

581

582

583 **References**

584

- 585 1. DeFelipe, J. The evolution of the brain, the human nature of cortical circuits, and intellectual  
586 creativity. *Front. Neuroanat.* **5**, 29 (2011).
- 587 2. Elston, G. N. Cortex, Cognition and the Cell: New Insights into the Pyramidal Neuron and  
588 Prefrontal Function. *Cereb. Cortex* **13**, 1124–1138 (2003).
- 589 3. Balam, P. & Kaas, J. H. Towards a unified scheme of cortical lamination for primary visual  
590 cortex across primates: Insights from NeuN and VGLUT2 immunoreactivity. *Front. Neuroanat.*  
591 (2014) doi:10.3389/fnana.2014.00081.
- 592 4. Testa-Silva, G. *et al.* High bandwidth synaptic communication and frequency tracking in human  
593 neocortex. *PLoS Biol.* **12**, e1002007 (2014).
- 594 5. Mohan, H. *et al.* Dendritic and Axonal Architecture of Individual Pyramidal Neurons across  
595 Layers of Adult Human Neocortex. *Cereb. Cortex* **25**, 4839–4853 (2015).
- 596 6. Testa-Silva, G. *et al.* Human synapses show a wide temporal window for spike-timing-  
597 dependent plasticity. *Front. Synaptic Neurosci.* **2**, 12 (2010).
- 598 7. Eyal, G., Mansvelder, H. D., de Kock, C. P. J. & Segev, I. Dendrites impact the encoding  
599 capabilities of the axon. *J. Neurosci.* **34**, 8063–8071 (2014).
- 600 8. Goriounova, N. A. *et al.* Large and fast human pyramidal neurons associate with intelligence.  
601 *Elife* **7**, (2018).
- 602 9. David, B., Idan, S. & Michael, L. Single Cortical Neurons as Deep Artificial Neural Networks.  
603 *bioRxiv* (2019) doi:10.1101/613141.
- 604 10. Poirazi, P., Brannon, T. & Mel, B. W. Pyramidal neuron as two-layer neural network. *Neuron* **37**,  
605 989–999 (2003).
- 606 11. Beaulieu-Laroche, L. *et al.* Enhanced Dendritic Compartmentalization in Human Cortical  
607 Neurons. *Cell* **175**, 643–651.e14 (2018).
- 608 12. Gidon, A. *et al.* Dendritic action potentials and computation in human layer 2/3 cortical  
609 neurons. *Science* **367**, 83–87 (2020).
- 610 13. Narr, K. L. *et al.* Relationships between IQ and regional cortical gray matter thickness in healthy  
611 adults. *Cereb. Cortex* **17**, 2163–2171 (2007).
- 612 14. Choi, Y. Y. *et al.* Multiple bases of human intelligence revealed by cortical thickness and neural  
613 activation. *J. Neurosci.* **28**, 10323–10329 (2008).
- 614 15. Deary, I. J., Penke, L. & Johnson, W. The neuroscience of human intelligence differences. *Nat.*  
615 *Rev. Neurosci.* **11**, 201–211 (2010).
- 616 16. Berger, M. *et al.* Standardized automated training of rhesus monkeys for neuroscience research  
617 in their housing environment. *J. Neurophysiol.* (2018) doi:10.1152/jn.00614.2017.
- 618 17. Hauser, M. D. *et al.* The mystery of language evolution. *Front. Psychol.* **5**, 401 (2014).
- 619 18. Geschwind, D. H., Miller, B. L., DeCarli, C. & Carmelli, D. Heritability of lobar brain volumes in  
620 twins supports genetic models of cerebral laterality and handedness. *Proc. Natl. Acad. Sci. U. S.*  
621 *A.* **99**, 3176–3181 (2002).
- 622 19. Binder, J. R., Desai, R. H., Graves, W. W. & Conant, L. L. Where Is the Semantic System? A Critical  
623 Review and Meta-Analysis of 120 Functional Neuroimaging Studies. *Cereb. Cortex* **19**, 2767–  
624 2796 (2009).
- 625 20. Damasio, H., Tranel, D., Grabowski, T., Adolphs, R. & Damasio, A. Neural systems behind word  
626 and concept retrieval. *Cognition* **92**, 179–229 (2004).
- 627 21. Hart, J. & Gordon, B. Delineation of single-word semantic comprehension deficits in aphasia,  
628 with anatomical correlation. *Ann. Neurol.* (1990) doi:10.1002/ana.410270303.
- 629 22. Hillis, A. E. & Caramazza, A. Category-specific naming and comprehension impairment: A double  
630 dissociation. *Brain* (1991) doi:10.1093/brain/114.5.2081.
- 631 23. Chertkow, H., Bub, D., Deaodon, C. & Whitehead, V. On the status of object concepts in aphasia.  
632 *Brain Lang.* (1997) doi:10.1006/brln.1997.1771.
- 633 24. Dronkers, N. F., Wilkins, D. P., Van Valin, R. D., Redfern, B. B. & Jaeger, J. J. Lesion analysis of the

- 634 brain areas involved in language comprehension. *Cognition* (2004)  
635 doi:10.1016/j.cognition.2003.11.002.
- 636 25. Ojemann, G. A., Schoenfield-McNeill, J. & Corina, D. P. Anatomic subdivisions in human  
637 temporal cortical neuronal activity related to recent verbal memory. *Nat. Neurosci.* (2002)  
638 doi:10.1038/nn785.
- 639 26. Ojemann, G. A., Creutzfeldt, O., Lettich, E. & Haglund, M. M. Neuronal activity in human lateral  
640 temporal cortex related to short-term verbal memory, naming and reading. *Brain* (1988)  
641 doi:10.1093/brain/111.6.1383.
- 642 27. Molnár, G. *et al.* Complex events initiated by individual spikes in the human cerebral cortex.  
643 *PLoS Biol.* **6**, e222 (2008).
- 644 28. Wang, B. *et al.* A Subtype of Inhibitory Interneuron with Intrinsic Persistent Activity in Human  
645 and Monkey Neocortex. *Cell Rep.* **10**, 1450–1458 (2015).
- 646 29. Hodge, R. D. *et al.* Conserved cell types with divergent features in human versus mouse cortex.  
647 *Nature* **536**, 171–178 (2019).
- 648 30. Verhoog, M. B. *et al.* Layer-specific cholinergic control of human and mouse cortical synaptic  
649 plasticity. *Nat. Commun.* **7**, 12826 (2016).
- 650 31. Obermayer, J. *et al.* Lateral inhibition by Martinotti interneurons is facilitated by cholinergic  
651 inputs in human and mouse neocortex. *Nat. Commun.* **9**, 4101–4114 (2018).
- 652 32. Kroon, T. *et al.* Group I mGluR-Mediated Activation of Martinotti Cells Inhibits Local Cortical  
653 Circuitry in Human Cortex. *Front. Cell. Neurosci.* **13**, 315 (2019).
- 654 33. Kong, X.-Z. *et al.* Mapping cortical brain asymmetry in 17,141 healthy individuals worldwide via  
655 the ENIGMA Consortium. *Proc. Natl. Acad. Sci. U. S. A.* **115**, E5154–E5163 (2018).
- 656 34. DeFelipe, J., Alonso-Nanclares, L. & Arellano, J. I. Microstructure of the neocortex: comparative  
657 aspects. *J. Neurocytol.* **31**, 299–316 (2002).
- 658 35. Kalmbach, B. E. *et al.* h-Channels Contribute to Divergent Intrinsic Membrane Properties of  
659 Supragranular Pyramidal Neurons in Human versus Mouse Cerebral Cortex. *Neuron* **100**, 1194-  
660 1208.e5 (2018).
- 661 36. Goriounova, N. A. *et al.* Large and fast human pyramidal neurons associate with intelligence.  
662 *Elife* (2018) doi:10.7554/eLife.41714.
- 663 37. Haier, R. J., Jung, R. E., Yeo, R. A., Head, K. & Alkire, M. T. Structural brain variation and general  
664 intelligence. *Neuroimage* **23**, 425–433 (2004).
- 665 38. Colom, R. *et al.* Gray matter correlates of fluid, crystallized, and spatial intelligence: Testing the  
666 P-FIT model. *Intelligence* **37**, 124–135 (2009).
- 667 39. Colom, R., Jung, R. E. & Haier, R. J. Distributed brain sites for the g-factor of intelligence.  
668 *Neuroimage* **31**, 1359–1365 (2006).
- 669 40. Karama, S. *et al.* Positive association between cognitive ability and cortical thickness in a  
670 representative US sample of healthy 6 to 18 year-olds. *Intelligence* **37**, 145–155 (2009).
- 671 41. McDaniel, M. Big-brained people are smarter: A meta-analysis of the relationship between in  
672 vivo brain volume and intelligence. *Intelligence* **33**, 337–346 (2005).
- 673 42. Basten, U., Hilger, K. & Fiebach, C. J. Where smart brains are different: A quantitative meta-  
674 analysis of functional and structural brain imaging studies on intelligence. *Intelligence* (2015)  
675 doi:10.1016/j.intell.2015.04.009.
- 676 43. Du, A.-T. *et al.* Different regional patterns of cortical thinning in Alzheimer’s disease and  
677 frontotemporal dementia. *Brain* **130**, 1159–1166 (2007).
- 678 44. Hof, P. R., Cox, K. & Morrison, J. H. Quantitative analysis of a vulnerable subset of pyramidal  
679 neurons in Alzheimer’s disease: I. Superior frontal and inferior temporal cortex. *J. Comp. Neurol.*  
680 **301**, 44–54 (1990).
- 681 45. Marín-Padilla, M. Ontogenesis of the pyramidal cell of the mammalian neocortex and  
682 developmental cytoarchitectonics: a unifying theory. *J. Comp. Neurol.* **321**, 223–240 (1992).
- 683 46. Hill, R. S. & Walsh, C. A. Molecular insights into human brain evolution. *Nature* **437**, 64–67  
684 (2005).

- 685 47. Kriegstein, A., Noctor, S. & Martínez-Cerdeño, V. Patterns of neural stem and progenitor cell  
686 division may underlie evolutionary cortical expansion. *Nat. Rev. Neurosci.* **7**, 883–890 (2006).
- 687 48. Shepherd, G. M. The microcircuit concept applied to cortical evolution: from three-layer to six-  
688 layer cortex. *Front. Neuroanat.* **5**, 30 (2011).
- 689 49. Weiler, N., Wood, L., Yu, J., Solla, S. A. & Shepherd, G. M. G. Top-down laminar organization of  
690 the excitatory network in motor cortex. *Nat. Neurosci.* **11**, 360–366 (2008).
- 691 50. Petanjek, Z. *et al.* The protracted maturation of associative layer IIC pyramidal neurons in the  
692 human prefrontal cortex during childhood: A major role in cognitive development and selective  
693 alteration in autism. *Frontiers in Psychiatry* (2019) doi:10.3389/fpsy.2019.00122.
- 694 51. Genç, E. *et al.* Diffusion markers of dendritic density and arborization in gray matter predict  
695 differences in intelligence. *Nat. Commun.* **9**, 1905 (2018).
- 696 52. Jacobs, B. Regional Dendritic and Spine Variation in Human Cerebral Cortex: a Quantitative  
697 Golgi Study. *Cereb. Cortex* **11**, 558–571 (2001).
- 698 53. Berwick, R. C., Friederici, A. D., Chomsky, N. & Bolhuis, J. J. Evolution, brain, and the nature of  
699 language. *Trends Cogn. Sci.* **17**, 89–98 (2013).
- 700 54. Fitch, W. T. Toward a computational framework for cognitive biology: Unifying approaches from  
701 cognitive neuroscience and comparative cognition. *Phys. Life Rev.* **11**, 329–364 (2014).
- 702 55. Der, G. & Deary, I. J. The relationship between intelligence and reaction time varies with age:  
703 Results from three representative narrow-age age cohorts at 30, 50 and 69 years. *Intelligence*  
704 **64**, 89–97 (2017).
- 705 56. Haglund, M. M., Ojemann, G. A., Schwartz, T. W. & Lettich, E. Neuronal activity in human lateral  
706 temporal cortex during serial retrieval from short-term memory. *J. Neurosci.* (1994)  
707 doi:10.1523/jneurosci.14-03-01507.1994.
- 708 57. Ojemann, G. A. & Schoenfield-Mcneill, J. Neurons in human temporal cortex active with verbal  
709 associative learning. *Brain Lang.* (1998) doi:10.1006/brln.1998.1982.
- 710 58. Quiñero, R., Kraskov, A., Koch, C. & Fried, I. Explicit Encoding of Multimodal Percepts by  
711 Single Neurons in the Human Brain. *Curr. Biol.* (2009) doi:10.1016/j.cub.2009.06.060.
- 712 59. Verhoog, M. B. *et al.* Mechanisms underlying the rules for associative plasticity at adult human  
713 neocortical synapses. *J. Neurosci.* **33**, 17197–17208 (2013).
- 714 60. Eyal, G. *et al.* Human cortical pyramidal neurons: From spines to spikes via models. *bioRxiv*  
715 267898 (2018).
- 716 61. Berg, J. *et al.* Human cortical expansion involves diversification and specialization of  
717 supragranular intratelencephalic-projecting neurons. *bioRxiv* (2020)  
718 doi:10.1101/2020.03.31.018820.
- 719 62. Gazzaniga, M. S. Forty-five years of split-brain research and still going strong. *Nat. Rev.*  
720 *Neurosci.* **6**, 653–659 (2005).
- 721 63. Ojemann, G., Ojemann, J., Lettich, E. & Berger, M. Cortical language localization in left,  
722 dominant hemisphere. An electrical stimulation mapping investigation in 117 patients. *J.*  
723 *Neurosurg.* (1989) doi:10.3171/jns.1989.71.3.0316.
- 724 64. Woollams, A. M. & Patterson, K. Cognitive consequences of the left-right asymmetry of atrophy  
725 in semantic dementia. *Cortex.* **107**, 64–77 (2018).
- 726 65. Fischl, B. & Dale, A. M. Measuring the thickness of the human cerebral cortex from magnetic  
727 resonance images. *Proc. Natl. Acad. Sci. U. S. A.* **97**, 11050–11055 (2000).
- 728 66. Fischl, B. Automatically Parcellating the Human Cerebral Cortex. *Cereb. Cortex* **14**, 11–22 (2004).
- 729  
730

731 **Acknowledgements**

732 N.A.G. received funding for this work from the Netherlands Organization for Scientific Research (NWO;  
733 VENI grant, 016.Veni.171.017). H.D.M. received funding for this work from the European Union's  
734 Horizon 2020 Framework Programme for Research and Innovation (Human Brain Project SGA2, 785907  
735 and HBP SGA3, 945539). Furthermore, research reported in this publication was supported by the  
736 National Institute of Mental Health under Award Number U01MH114812.

737

738

739 **Author contributions**

740 Heyer DB: e-phys data acquisition, data analysis, writing manuscript

741 Wilbers R: data acquisition, data analysis

742 Galakhova A: slice histology

743 Hartsema Els: cell density quantification

744 Braak S: layer structure analysis

745 Hunt S: e-phys data acquisition

746 Verhoog MB: e-phys data acquisition

747 Mertens E: morphology data acquisition

748 Muijtjens ML: cell density quantification

749 Idema S: performed neurosurgery and tissue procurement

750 Baayen JC: performed neurosurgery and tissue procurement

751 de Witt Hamer P: performed neurosurgery and tissue procurement

752 Klein M: IQ data acquisition

753 McGraw M: histology data acquisition

754 Lein ES: histology data acquisition

755 de Kock CPJ: morphology data acquisition and analysis

756 Mansvelder HD: study design, data analysis, writing manuscript

757 Goriounova NA: study design, e-phys data acquisition, histology data acquisition, data analysis, writing  
758 manuscript

759

760 **Competing interests**

761 The authors declare no competing interests.

762

763

764 **Supplementary tables**

765

766 **Supplementary table 1.** Subject details.

| <b>Subject number</b> | <b>Gender</b> | <b>Age</b> | <b>Hemisphere resection</b> | <b>Diagnosis</b> | <b>Antiepileptic drugs</b>      |
|-----------------------|---------------|------------|-----------------------------|------------------|---------------------------------|
| 1                     | Male          | 34         | Right                       | Other            | CBZ; VPA; PHT; CLB              |
| 2                     | Female        | 27         | Right                       | MTS              | CBZ; LTG<br>CBZ; LEV; TPM;      |
| 3                     | Female        | 41         | Right                       | Other            | CLB                             |
| 4                     | Male          | 25         | Left                        | Tumor            | CBZ; LEV; LCS                   |
| 5                     | Female        | 30         | Left                        | MTS              | CLB; OXC                        |
| 6                     | Female        | 33         | Right                       | MTS              | CBZ; LEV; CLB                   |
| 7                     | Female        | 42         | Left                        | MTS              | CBZ; LEV                        |
| 8                     | Male          | 39         | Right                       | MTS              | CBZ                             |
| 9                     | Male          | 28         | Left                        | Tumor            | LEV; LTG                        |
| 10                    | Male          | 40         | Left                        | MTS              | CBZ; LEV; VPA                   |
| 11                    | Male          | 51         | Right                       | Other            | CBZ                             |
| 12                    | Female        | 47         | Right                       | Tumor            | CBZ                             |
| 13                    | Female        | 58         | Left                        | MTS              | CZP                             |
| 14                    | Female        | 40         | Right                       | MTS              | CBZ; CLB                        |
| 15                    | Female        | 31         | Right                       | MTS              | CBZ; CLB                        |
| 16                    | Female        | 45         | Right                       | MTS              | CBZ; CLB; LTG                   |
| 17                    | Male          | 51         | Right                       | Other            | CBZ; CLB                        |
| 18                    | Male          | 21         | Left                        | Tumor            | CBZ; LEV; LTG                   |
| 19                    | Female        | 48         | Right                       | Cavernoma        | CBZ; DZP                        |
| 20                    | Male          | 49         | Left                        | MTS              | CBZ; CLB; LEV                   |
| 21                    | Male          | 44         | Left                        | MTS              | LCS; VPA                        |
| 22                    | Female        | 48         | Right                       | Other            | LEV; LTG                        |
| 23                    | Male          | 19         | Right                       | Other            | CLB; OXC                        |
| 24                    | Male          | 44         | Left                        | MTS              | LEV; LTG                        |
| 25                    | Female        | 21         | Right                       | Other            | LEV; VPA<br>CBZ; CLB; LEV; LTG; |
| 26                    | Female        | 40         | Right                       | MTS              | RET                             |
| 27                    | Female        | 31         | Left                        | Tumor            | CBZ; LEV                        |
| 28                    | Female        | 17         | Right                       | Tumor            | OXC                             |
| 29                    | Male          | 38         | Right                       | MTS              | CBZ                             |
| 30                    | Male          | 20         | Right                       | Tumor            | CBZ; LEV                        |
| 31                    | Male          | 20         | Left                        | Other            | CBZ; CLB                        |
| 32                    | Male          | 60         | Left                        | MTS              | LEV; LTG                        |
| 33                    | Female        | 23         | Left                        | MTS              | LEV; OXC                        |
| 34                    | Male          | 41         | Right                       | Tumor            | CBZ; LTG                        |
| 35                    | Female        | 24         | Left                        | MTS              | LEV; LTG                        |
| 36                    | Male          | 25         | Left                        | MTS              | CLB; LEV; LCS                   |
| 37                    | Male          | 53         | Left                        | MTS              | CBZ; CLB                        |
| 38                    | Male          | 54         | Left                        | Cavernoma        | VPA                             |

---

|    |        |    |       |           |                                 |
|----|--------|----|-------|-----------|---------------------------------|
| 39 | Female | 27 | Right | Other     | LEV; LTG                        |
| 40 | Female | 29 | Left  | MTS       | LTG; TPM                        |
| 41 | Male   | 41 | Left  | MTS       | CBZ; CLB; LEV<br>CLB; LTG; ZNS; |
| 42 | Female | 40 | Right | MTS       | MDZ                             |
| 43 | Female | 31 | Left  | MTS       | CBZ; CLB; VGB                   |
| 44 | Male   | 18 | Right | MTS       | OXC                             |
| 45 | Female | 35 | Left  | Other     | LEV; LTG; LCS; CZP              |
| 46 | Female | 53 | Left  | Other     | LEV; LTG                        |
| 47 | Male   | 49 | Right | MTS       | CBZ                             |
| 48 | Female | 53 | Left  | MTS       | CBZ                             |
| 49 | Male   | 41 | Right | Cavernoma | CBZ                             |
| 50 | Female | 20 | Right | Other     | CBZ; LEV                        |
| 51 | Male   | 43 | Right | MTS       | LEV; OXC                        |
| 52 | Male   | 29 | Right | Other     | CBZ; PB                         |
| 53 | Female | 66 | Left  | Tumor     | None                            |
| 54 | Female | 48 | Right | MTS       | CBZ; VPA; ZNS                   |
| 55 | Male   | 23 | Right | MTS       | OXC                             |
| 56 | Female | 31 | Right | MTS       | LEV; LTG                        |
| 57 | Male   | 44 | Right | MTS       | CBZ; LTG; VPA                   |
| 58 | Female | 31 | Left  | Other     | LCS                             |
| 59 | Female | 53 | Right | MTS       | LEV; PB                         |

---

767 Note. Mesial temporal sclerosis (MTS); Antiepileptic drugs specified: Carbamazepine (CBZ); Lamotrigine  
768 (LTG); Levetiracetam (LEV); Topiramate (TPM); Clo- bazam (CLB); Oxcarbazepine (OXC); Clonazepam  
769 (CZP); Phenobarbital (PB); Phenytoin (PHT); Lacosamide (LCS); Sodium valproate (VPA); Zonisamide (ZNS);  
770 Diazepam (DZP); Midazolam (MDZ); Vigabatrin (VGB).

771

772

773

774

775 **Supplementary table 2.** Linear regression results indicate no relationship between the investigated  
 776 parameters, disease severity or age in both left and right MTG.

| Hemisphere                      |                | Epilepsy onset |       | Epilepsy duration |       | Seizure frequency |       | Age   |       |
|---------------------------------|----------------|----------------|-------|-------------------|-------|-------------------|-------|-------|-------|
|                                 |                | Left           | Right | Left              | Right | Left              | Right | Left  | Right |
| <b>VIQ</b>                      | R <sup>2</sup> | 0.039          | 0.003 | 0.020             | 0.051 | 0.166             | 0.021 | 0.005 | 0.028 |
|                                 | <i>p</i>       | 0.66           | 0.82  | 0.70              | 0.63  | 0.33              | 0.70  | 0.82  | 0.69  |
|                                 | F              | 1.04           | 0.09  | 0.54              | 1.45  | 5.17              | 0.56  | 0.12  | 0.78  |
|                                 | df             | 1, 26          | 1, 27 | 1, 26             | 1, 27 | 1, 26             | 1, 26 | 1, 26 | 1, 27 |
| <b>Total cortical thickness</b> | R <sup>2</sup> | 0.129          | 0.090 | 0.222             | 0.007 | 0.052             | 0.039 | 0.013 | 0.087 |
|                                 | <i>p</i>       | 0.58           | 0.63  | 0.33              | 0.82  | 0.66              | 0.70  | 0.82  | 0.63  |
|                                 | F              | 2.53           | 1.49  | 4.84              | 0.11  | 0.94              | 0.57  | 0.22  | 1.43  |
|                                 | df             | 1, 17          | 1, 15 | 1, 17             | 1, 15 | 1, 17             | 1, 14 | 1, 17 | 1, 15 |
| <b>L2/3 thickness</b>           | R <sup>2</sup> | 0.148          | 0.007 | 0.080             | 0.011 | 0.110             | 0.052 | 0.021 | 0.000 |
|                                 | <i>p</i>       | 0.58           | 0.82  | 0.63              | 0.82  | 0.63              | 0.69  | 0.76  | 0.97  |
|                                 | F              | 2.96           | 0.11  | 1.48              | 0.17  | 2.1               | 0.77  | 0.37  | 0.002 |
|                                 | df             | 1, 17          | 1, 15 | 1, 17             | 1, 15 | 1, 17             | 1, 14 | 1, 17 | 1, 15 |
| <b>TDL</b>                      | R <sup>2</sup> | 0.373          | 0.108 | 0.028             | 0.016 | 0.006             | 0.082 | 0.251 | 0.084 |
|                                 | <i>p</i>       | 0.31           | 0.63  | 0.76              | 0.82  | 0.84              | 0.66  | 0.38  | 0.66  |
|                                 | F              | 7.74           | 1.46  | 0.38              | 0.19  | 0.07              | 0.99  | 4.36  | 1.1   |
|                                 | df             | 1, 13          | 1, 12 | 1, 13             | 1, 12 | 1, 11             | 1, 11 | 1, 13 | 1, 12 |
| <b>AP rise speed</b>            | R <sup>2</sup> | 0.120          | 0.027 | 0.096             | 0.181 | 0.002             | 0.097 | 0.008 | 0.340 |
|                                 | <i>p</i>       | 0.63           | 0.70  | 0.66              | 0.33  | 0.92              | 0.58  | 0.82  | 0.09  |
|                                 | F              | 1.64           | 0.63  | 1.28              | 5.09  | 0.02              | 2.48  | 0.10  | 11.9  |
|                                 | df             | 1, 12          | 1, 23 | 1, 12             | 1, 23 | 1, 11             | 1, 23 | 1, 12 | 1, 23 |

777 Note: p-values are adjusted for multiple comparisons.  
 778



779 **Supplementary figures**

780

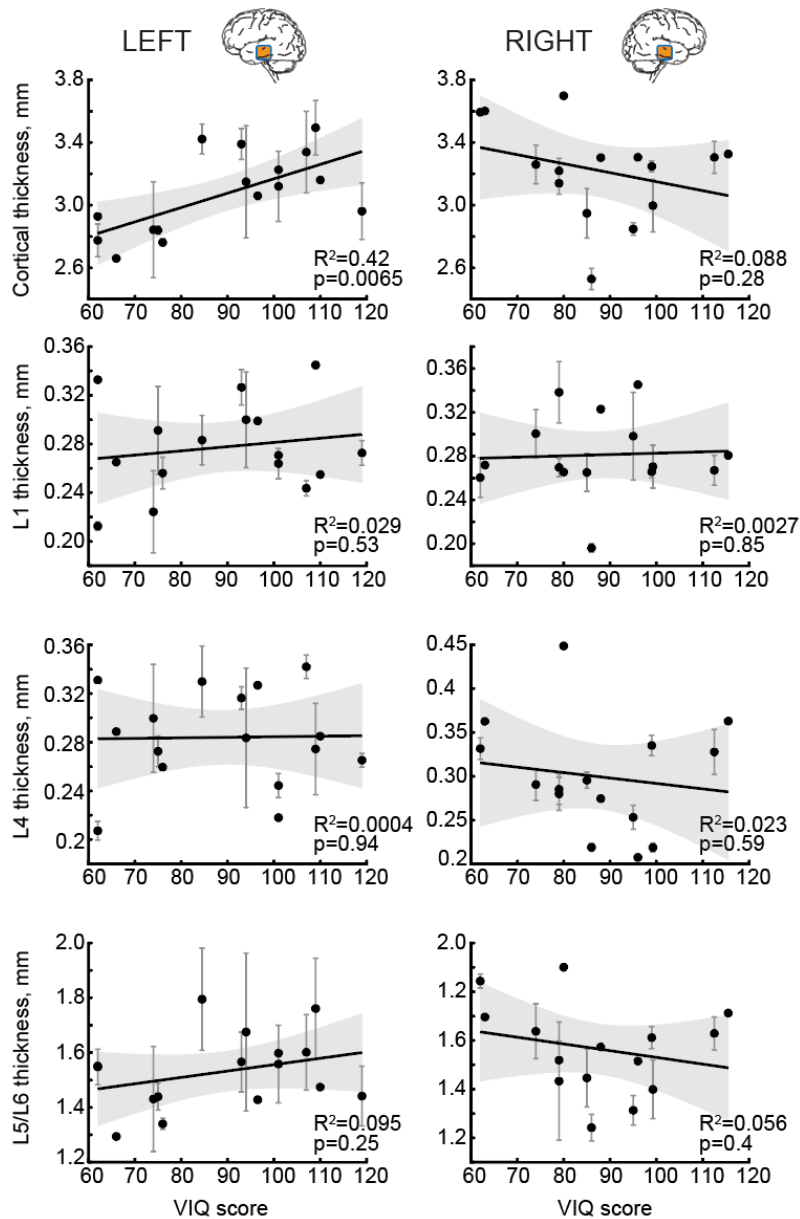

781

782 **Supplementary figure 1. Linear regressions for VIQ with total cortical thickness and L1, L4, and L5/L6 thickness.**

783 in the left (left, n subjects = 16, n slices = 35, total:  $F(1,14) = 10.2$ , L1:  $F(1,14) = 0.42$ , L4:  $F(1,14) = 0.006$ , L5/L6:

784  $F(1,14) = 1.47$ ) and right (right, n subjects = 15, n slices = 41, total:  $F(1,13) = 1.25$ , L1:  $F(1,13) = 0.04$ , L4:  $F(1,13) =$

785  $0.30$ , L5/L6:  $F(1,13) = 0.77$ ) MTG. Only total cortical thickness in the left MTG shows significant positive

786 correlation with VIQ.

787

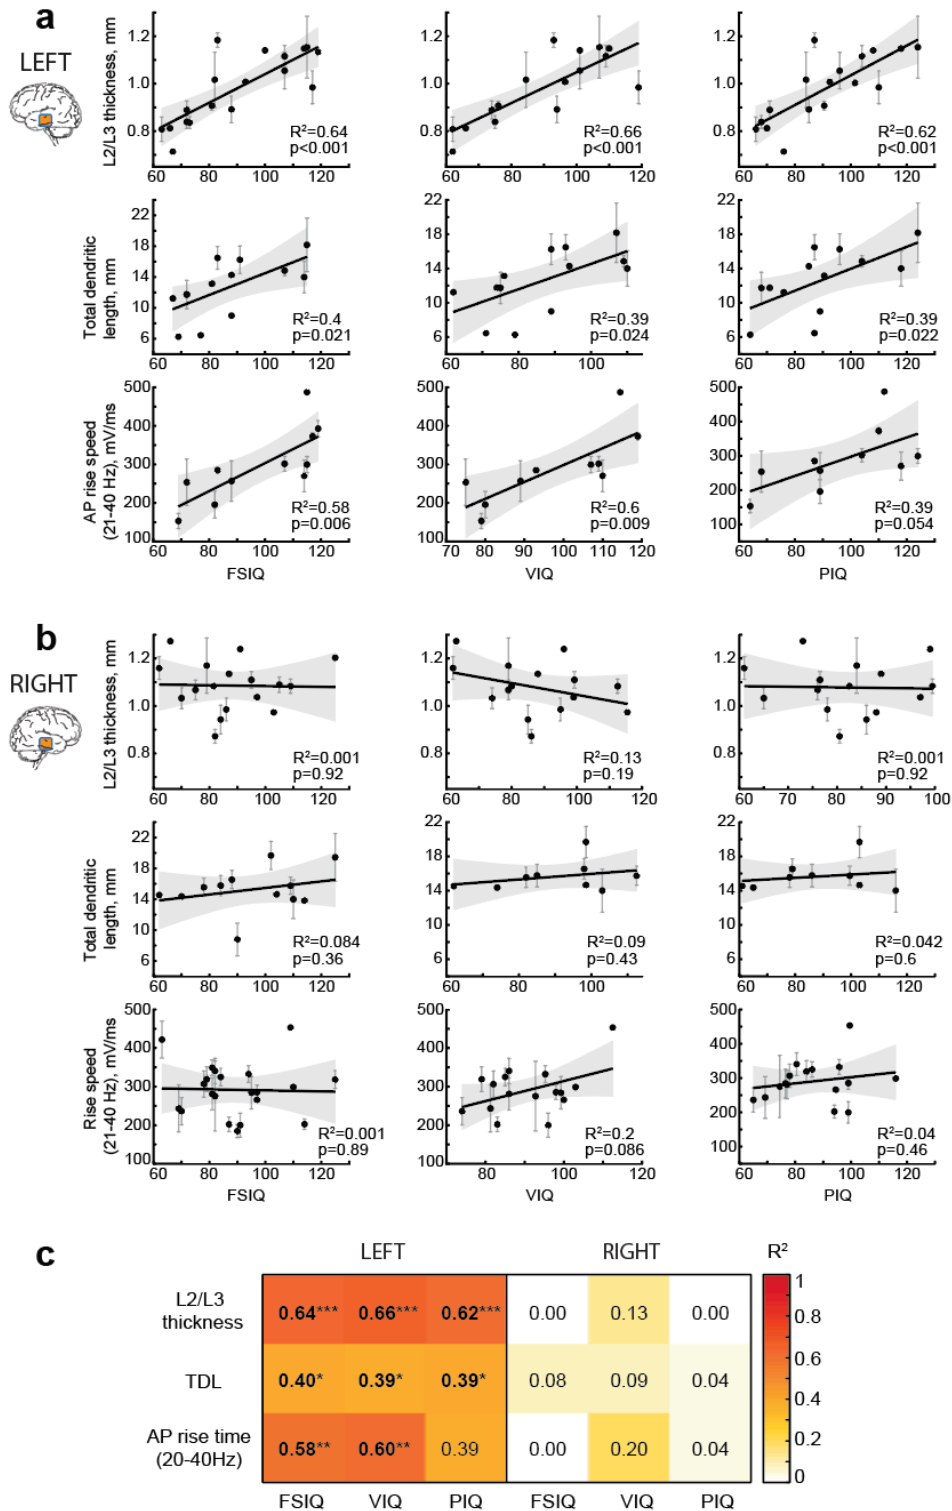

788  
789

790 Supplementary figure 2. **The relationship between FSIQ, VIQ and PIQ, and cortical structure and cellular**  
791 **properties.** **a** in the left and **b** right MTG. **c** Summary of linear regression results showing R<sup>2</sup> values for all  
792 regressions in **a** and **b**.

793

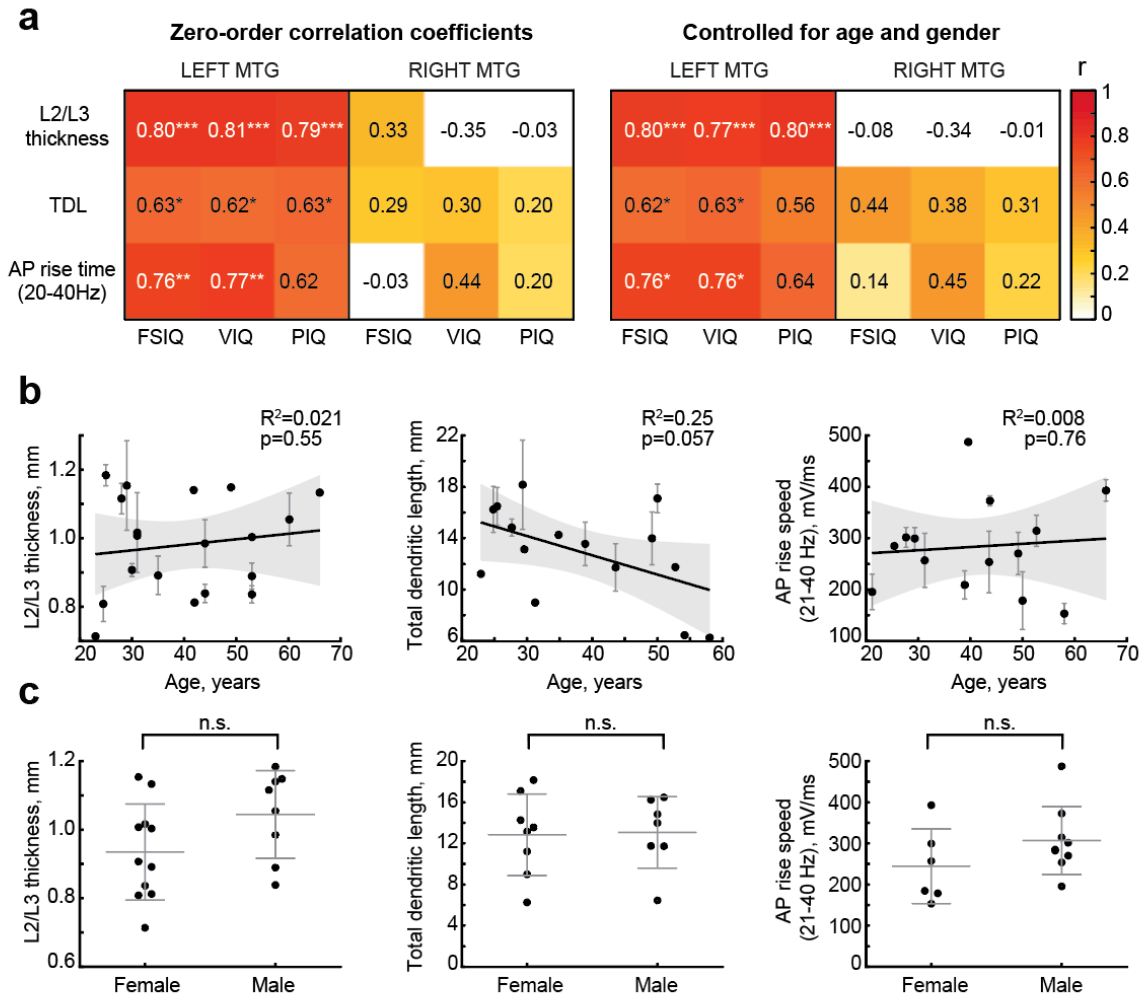

794  
 795 **Supplementary figure 3. Age and gender do not influence the relationship between VIQ (and FSIQ) and cortical**  
 796 **structure and cellular properties in the left MTG. a** Partial correlation analysis summary showing zero-order  
 797 correlation coefficients in the left panel and partial correlation coefficients controlled for age and gender in the  
 798 right panel for relationship of FSIQ, VIQ and PIQ with L2/L3 thickness, total dendritic length and AP rise speed  
 799 (20-40 Hz) in the left and right MTG. R remain high and significant for FSIQ and VIQ after controlling for age and  
 800 gender (right). Correlation coefficients are color-coded, p-values are indicated with stars: \* $p < .05$ ; \*\* $p < .01$ ;  
 801 \*\*\* $< .001$ . **b** Age of the subjects does not correlate with L2/L3 thickness of the left MTG (n subjects = 19, n slices =  
 802 40,  $F(1,17) = 0.37$ ), total dendritic length (n subjects = 15, n cells = 41,  $F(1,13) = 4.36$ ) and AP rise speed (20-40 Hz,  
 803 n subjects = 14, n cells = 47,  $F(1,12) = 0.10$ ) of neurons in the left MTG.  $R^2$  and p-values are shown as insets. **c**  
 804 Female and male subjects do not significantly differ in their L2/L3 thickness of the left MTG (females  $M(SD) =$   
 805  $0.934(0.140)$  mm, males  $M(SD) = 1.044(0.127)$  mm,  $z(n = 19) = -1.53$ ;  $p = 0.127$ ), total dendritic length (females  
 806  $M(SD) = 12.84(3.96)$  mm, males  $M(SD) = 13.07(3.49)$  mm,  $z(n = 15) = -0.174$ ;  $p = 0.862$ ), and AP rise speed (20-40  
 807 Hz) of neurons in the left MTG (females  $M(SD) = 244.28(91.03)$  mV/ms, males  $M(SD) = 307.01(82.63)$  mV/ms,  $z(n$   
 808  $= 15) = -1.36$ ;  $p = 0.175$ ).

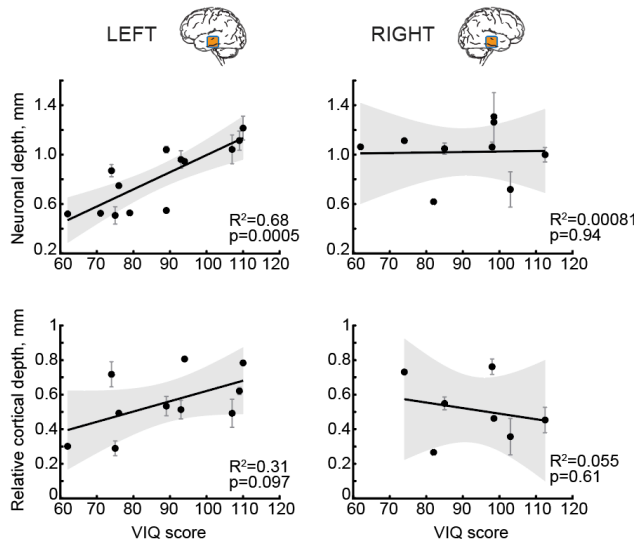

809  
810 **Supplementary figure 4. VIQ positively correlates with the absolute, but not relative cortical depth of neurons in**  
811 **the left MTG.** Relationship between VIQ and absolute and relative cortical L2/L3 depth of neurons in the left (left,  
812 absolute: n subjects = 13, n cells = 33,  $F(1,11) = 23.4$ , relative: n subjects = 10, n cells = 24,  $F(1,8) = 3.54$ ) and right  
813 (right, absolute: n subjects = 9, n cells = 30,  $F(1,7) = 0.006$ , relative: n subjects = 7, n cells = 19,  $F(1,5) = 0.29$ ) MTG  
814 used for morphological analysis in Figure 3b-d.  
815
